# Supplementary material for: A randomised controlled trial to assess whether prehabilitation improves fitness in patients undergoing neoadjuvant treatment prior to oesophagogastric cancer surgery: study protocol
Source: PubMed Central journal article supplement — BMJ Open. 2018 Dec 22;8(12):e023190. doi: 10.1136/bmjopen-2018-023190 (PMC6318540; doi:10.1136/bmjopen-2018-023190), 2018-12-22
Supplement: bmjopen-2018-023190.draft_revisions.pdf [file bmjopen-2018-023190.draft_revisions.pdf]

# BMJ Open

BMJ Open is committed to open peer review. As part of this commitment we make the peer review history of every article we publish publicly available.

When an article is published we post the peer reviewers' comments and the authors' responses online. We also post the versions of the paper that were used during peer review. These are the versions that the peer review comments apply to.

The versions of the paper that follow are the versions that were submitted during the peer review process. They are not the versions of record or the final published versions. They should not be cited or distributed as the published version of this manuscript.

BMJ Open is an open access journal and the full, final, typeset and author-corrected version of record of the manuscript is available on our site with no access controls, subscription charges or pay-per-view fees (<http://bmjopen.bmj.com>).

If you have any questions on BMJ Open's open peer review process please email [info.bmjopen@bmj.com](mailto:info.bmjopen@bmj.com)

# BMJ Open

**A randomised controlled trial to assess whether prehabilitation improves fitness in patients undergoing neoadjuvant treatment prior to oesophago-gastric cancer surgery: Protocol**

|                               |                                                                                                                                                                                                                                                                                                                                                                                                                                                                                                                                                                                                                                                                  |
|-------------------------------|------------------------------------------------------------------------------------------------------------------------------------------------------------------------------------------------------------------------------------------------------------------------------------------------------------------------------------------------------------------------------------------------------------------------------------------------------------------------------------------------------------------------------------------------------------------------------------------------------------------------------------------------------------------|
| Journal:                      | <i>BMJ Open</i>                                                                                                                                                                                                                                                                                                                                                                                                                                                                                                                                                                                                                                                  |
| Manuscript ID                 | bmjopen-2018-023190                                                                                                                                                                                                                                                                                                                                                                                                                                                                                                                                                                                                                                              |
| Article Type:                 | Protocol                                                                                                                                                                                                                                                                                                                                                                                                                                                                                                                                                                                                                                                         |
| Date Submitted by the Author: | 02-Apr-2018                                                                                                                                                                                                                                                                                                                                                                                                                                                                                                                                                                                                                                                      |
| Complete List of Authors:     | Allen, Sophie; The Royal Surrey County Hospital, Oesophago-gastric Surgery<br>Brown, Vanessa; The Royal Surrey County Hospital, Oesophago-gastric Surgery<br>Prabhu, Pradeep; The Royal Surrey County Hospital, Oesophago-gastric Surgery<br>Scott, Michael; University of Surrey, Anaesthesia & Intensive Care Medicine; Royal Surrey County Hospital NHS Foundation Trust, Anaesthesia & Intensive Care Medicine<br>Rockall, Timothy; The Royal Surrey County Hospital, Oesophago-gastric Surgery<br>Preston, Shaun; The Royal Surrey County Hospital, Oesophago-gastric Surgery<br>Sultan, Javed; The Royal Surrey County Hospital, Oesophago-gastric Surgery |
| Keywords:                     | Prehabilitation, Oesophageal, Cancer, Neoadjuvant, Cardiopulmonary Exercise Test                                                                                                                                                                                                                                                                                                                                                                                                                                                                                                                                                                                 |
|                               |                                                                                                                                                                                                                                                                                                                                                                                                                                                                                                                                                                                                                                                                  |

SCHOLARONE™  
Manuscripts

1  
2  
3 **A randomised controlled trial to assess whether prehabilitation improves**  
4 **fitness in patients undergoing neoadjuvant treatment prior to oesophago-**  
5 **gastric cancer surgery: Protocol**  
6  
7  
8

9 Trial registration number: NCT02950324 1/11/16

10  
11 v1.2 14/10/2016  
12  
13

14  
15  
16 Sophie Allen, Vanessa Brown, Pradeep Prabhu, Michael Scott, Timothy Rockall,  
17  
18 Shaun Preston, Javed Sultan  
19  
20

21  
22 Corresponding author:  
23

24 Javed Sultan,  
25

26 Department of Oesophagogastric Surgery,  
27

28 The Royal Surrey County Hospital,  
29

30 Egerton Road,  
31

32 Guildford,  
33

34 UK,  
35

36 GU2 7XX  
37  
38  
39  
40

41 Email: [javed.sultan@nhs.net](mailto:javed.sultan@nhs.net)  
42

43 Telephone: 01483 571122  
44

45 Fax: 01483 406636  
46  
47  
48  
49

50 Sophie Allen, The Royal Surrey County Hospital NHS Foundation Trust, Guildford, UK

51 Vanessa Brown, The Royal Surrey County Hospital NHS Foundation Trust, Guildford,  
52

53 UK  
54  
55  
56  
57  
58  
59  
60

1  
2  
3 Pradeep Prabhu, The Royal Surrey County Hospital NHS Foundation Trust, Guildford,  
4  
5 UK

6  
7 Michael Scott, The Royal Surrey County Hospital NHS Foundation Trust, Guildford,  
8  
9 UK

10  
11 Timothy Rockall, The Royal Surrey County Hospital NHS Foundation Trust, Guildford,  
12  
13 UK

14  
15 Shaun Preston, The Royal Surrey County Hospital NHS Foundation Trust, Guildford,  
16  
17 UK

18  
19 Javed Sultan, The Royal Surrey County Hospital NHS Foundation Trust, Guildford, UK  
20  
21 – *corresponding author*  
22  
23

24  
25  
26 **Keywords and phrases:** Prehabilitation; Oesophageal; Cancer; Neoadjuvant;  
27  
28 Cardiopulmonary Exercise Test  
29  
30

31  
32  
33 **Word count 4482**  
34  
35

### 36 37 38 39 **Abstract** 40

#### 41 42 43 **Introduction** 44

45  
46 Neoadjuvant therapy prior to oesophago-gastric resection is the gold standard of care  
47  
48 for patients with T2 and/or nodal disease. Despite this, studies have taught us that  
49  
50 chemotherapy decreases patients' functional capacity as assessed by  
51  
52 cardiopulmonary exercise (CPX) testing. We aim to show that a multimodal  
53  
54 prehabilitation programme comprising of supervised exercise, psychological coaching  
55  
56  
57  
58  
59  
60

1  
2  
3 and nutritional support, will physically, psychologically and metabolically optimise  
4 these patients prior to oesophago-gastric cancer surgery so they may better withstand  
5 the immense physical and metabolic stress placed upon them by radical curative  
6 major surgery.  
7  
8  
9  
10

## 11 12 13 **Methods and Analysis**

14  
15 This will be a prospective, randomised, controlled, parallel, single-centre superiority  
16 trial comparing a multimodal 'prehabilitation' intervention with 'standard care' in  
17 patients with oesophago-gastric malignancy who are treated with neoadjuvant therapy  
18 prior to surgical resection. The primary aim is to demonstrate an improvement in  
19 baseline cardiopulmonary function as assessed by anaerobic threshold during CPX  
20 testing in an interventional (Prehab) group following a 15-week preoperative exercise  
21 programme, throughout and following neoadjuvant treatment, when compared with  
22 those that undergo standard care (Control group). Secondary objectives include  
23 changes in Peak  $\text{VO}_2$  and Work Rate (total watts achieved) at CPX testing, insulin  
24 resistance, quality of life, chemotherapy related toxicity and completions, nutritional  
25 assessment, postoperative complication rate, length of stay, and overall mortality.  
26  
27  
28  
29  
30  
31  
32  
33  
34  
35  
36  
37  
38  
39  
40  
41

## 42 **Ethics and dissemination**

43  
44 This study has been approved by the London-Bromley Research Ethics Committee  
45 and registered on ClinicalTrials.gov. The results will be disseminated in a peer-  
46 reviewed journal. Trial registration number: NCT02950324.  
47  
48  
49  
50  
51

## 52 **'Article summary' Strengths of limitations**

**Strengths:**

- To our knowledge, no studies assessing the feasibility of a supervised exercise programme during chemotherapy before surgery for oesophago-gastric cancer have been published.
- This is a prospective, parallel, randomised-controlled trial with patients randomised in a 1:1 manner and subjects analysed on an intention-to-treat basis.
- The exercise component of the prehabilitation programme is supervised by a Clinical Exercise Scientist who will construct a rigorous, tailored, individual, exercise programme for each patient based on their baseline functional capacity as assessed by cardiopulmonary exercise testing.
- CPX is established, noninvasive and safe and may be considered the 'gold standard' method of assessing patients' cardiopulmonary reserve prior to surgery. CPX outcome measures will be objectively measured by an experienced consultant anaesthetist, external to the trial study group.

**Limitations:**

- The unblinded, single-centre trial has a relatively small sample size is powered for AT and not clinical outcomes.

**Introduction**

As a result of the MAGIC [1] and OEO2 [2] trials, neoadjuvant therapy followed by surgery gives the best chance of cure for patients diagnosed with locally advanced oesophago-gastric cancer. It aims to increase the chance of curative resection by

1  
2  
3 eliminating micrometastases, downsizing the tumour and increasing the R0 resection  
4 rate [1, 3, 4]. The ongoing open label, phase III Neo-AEGIS trial [5], compares pre and  
5 postoperative chemotherapy and neoadjuvant chemoradiotherapy as per the MAGIC  
6 and CROSS [6] protocols respectively.  
7  
8  
9  
10

11  
12  
13 Adequate cardiopulmonary function is of great importance to patients undergoing  
14 oesophago-gastric cancer surgery (OGCS) such as Ivor Lewis oesophagectomy, as  
15 this major two stage, two field elective operation is associated with a large metabolic  
16 stress response and significant morbidity [7]. Reported side effects of chemotherapy  
17 are a reduction in functional capacity, which can be objectively measured using  
18 cardiopulmonary exercise testing (CPX). CPX is an established, noninvasive and safe  
19 method of assessing patients' cardiopulmonary reserve prior to surgery. Both  
20 anaerobic threshold (AT) and peak oxygen uptake (Peak  $\text{VO}_2$ ) have consistently been  
21 associated with morbidity and functional outcomes in patients undergoing major  
22 elective surgery [8-11], with a reported average decrease in AT of 2 ml/kg/min in  
23 patients undergoing neoadjuvant chemotherapy (NAC) prior to oesophagectomy.  
24 Furthermore, this decrease in fitness has been associated with diminished one year  
25 survival in these patients [12].  
26  
27  
28  
29  
30  
31  
32  
33  
34  
35  
36  
37  
38  
39  
40  
41  
42  
43

44 The emerging concept of 'prehabilitation' is the process of enhancing an individual's  
45 functional capacity to enable them to withstand a stressful event such as major  
46 elective surgery. A key component of prehabilitation, physical exercise training, has  
47 led to improvements in AT [13, 14]. When initiated in the neoadjuvant setting,  
48 prehabilitation may have important implications as exercise training can stimulate  
49 skeletal muscle adaptations such as increased mitochondrial content and improve  
50  
51  
52  
53  
54  
55  
56  
57  
58  
59  
60

1  
2  
3 oxygen uptake capacity [15]. Both West et al. [16] and Heldens et al. [17] have  
4  
5 demonstrated that an exercise programme during neoadjuvant therapy for cancer is  
6  
7 feasible, with minimal patient drop-out.  
8  
9

10  
11 Another key component of prehabilitation is a psychological intervention which aims to  
12  
13 reduce the pre and perioperative anxiety associated with neoadjuvant treatment and  
14  
15 major surgery, as well as maintain adherence to a preoperative exercise  
16  
17 prehabilitation programme [18].  
18  
19

20  
21  
22 In addition to cardiopulmonary function and anxiety, the physiological stress of surgery  
23  
24 is associated with various metabolic derangements, central to which is the  
25  
26 development of insulin resistance (IR). The degree of insulin resistance appears to be  
27  
28 related to the magnitude of the 'surgical stress'. IR may be one of the key mechanisms  
29  
30 triggering major inflammatory complications following surgery [19, 20].  
31  
32

33  
34  
35 Sarcopenia, the involuntary loss of muscle mass, is readily induced as a result of  
36  
37 chemotherapy. Oesophago-gastric cancer patients with signs of sarcopenia have been  
38  
39 shown to have high rates of treatment drop-out, higher postoperative complication  
40  
41 rates, and reduced overall survival [21, 22].  
42  
43

44  
45  
46 To our knowledge there are no published studies assessing the feasibility of a  
47  
48 supervised exercise programme during chemotherapy before surgery for oesophago-  
49  
50 gastric cancer. The primary aim is to demonstrate an improvement in baseline  
51  
52 cardiopulmonary function as assessed by anaerobic threshold during CPX testing in  
53  
54 an interventional (Prehab) group following a 15 week preoperative exercise  
55  
56  
57  
58  
59  
60



1  
2  
3 programme, throughout and following neoadjuvant treatment, when compared with  
4 those that undergo standard care (Control group).  
5  
6  
7

## 8 9 **Methods and Analysis**

### 10 11 12 13 **Study setting**

14  
15 This study is a prospective, randomised, controlled, parallel, open single-centre  
16 superiority trial which will compare 'prehabilitation' with 'standard care' in patients with  
17 oesophago-gastric cancer who are treated with neoadjuvant chemotherapy or  
18 chemoradiotherapy (as part of the Neo-AEGIS trial) prior to surgical resection. The trial  
19 and treatment will be conducted at the Royal Surrey County Hospital (UK), a tertiary  
20 referral centre for oesophago-gastric malignancy.  
21  
22  
23  
24  
25  
26  
27  
28  
29  
30

### 31 **Study objectives**

32  
33 In the intervention (Prehab) group, the primary objective is to demonstrate an  
34 improvement in baseline AT following a 15-week preoperative exercise programme  
35 which will take place throughout NAC and during the 6-week period of recovery prior to  
36 surgical resection. AT will be compared with those that undergo standard care (the  
37 control group).  
38  
39  
40  
41  
42  
43  
44  
45

46 Secondary objectives will include assessment of the protocol feasibility (as determined  
47 by subject drop-out, and both attendance, and adherence, to Prehab exercise  
48 sessions). Alternative measures of functional reserve will be evaluated, in particular  
49 change in Peak VO<sub>2</sub> and Work Rate (total watts achieved) during CPX testing. The  
50 effect of a Prehab programme on insulin resistance will be assessed by the HOMA2  
51  
52  
53  
54  
55  
56  
57  
58  
59  
60

1  
2  
3 calculation. Further secondary objectives include the effect of the Prehab programme  
4 on chemotherapy related toxicities, tolerance and completion rates, the impact of  
5 preoperative psychological coaching on validated quality of life scores (EORTC QLQ-  
6 C30, EORTC QLQ –OG25, Beck Anxiety Inventory (BAI)), and Beck Depression  
7 Inventory (BDI II)), and the effect of prehabilitation on nutritional status as assessed  
8 using hand grip strength and sarcopenia. Postoperative complications will be  
9 assessed using the Clavien-Dindo classification and as agreed per the  
10 Esophagectomy Complications Consensus Group [23]. Length of intensive care and  
11 hospital stay, 30 day, 90 day, 1 year and 5 year mortality will also be analysed.  
12  
13  
14  
15  
16  
17  
18  
19  
20  
21  
22  
23

#### 24 **Inclusion and exclusion criteria**

25 Patients with T2 and / or N1 resectable oesophago-gastric carcinoma being  
26 considered for neoadjuvant therapy prior to oesophago-gastrectomy or extended total  
27 gastrectomy will be included. Patients will be excluded if they fulfill one or more of the  
28 following criteria: <18 years of age, a known contraindication to CPX testing (e.g.  
29 unstable cardiac disease), a physical inability to perform CPX testing or undertake a  
30 prehabilitation exercise programme (e.g. lower limb dysfunction), pregnancy (or those  
31 planning to become pregnant), or a lack of capacity to give informed consent.  
32  
33  
34  
35  
36  
37  
38  
39  
40  
41  
42  
43

44 Guidelines to cessation of participation in the study will include withdrawal of patient  
45 consent, serious adverse event, and non-compliance. Decision for patient-withdrawal  
46 will be made by the Chief Investigator in conjunction with the trial Sponsor. In the case  
47 of withdrawal, the patient will continue standard treatment within the dedicated  
48 oesophago-gastric and oncological departments.  
49  
50  
51  
52  
53  
54  
55  
56  
57  
58  
59  
60

## Interventions

Following a dedicated oesophago-gastric staging pathway, including Anaesthetic and Cancer Multi-disciplinary Team (MDT) discussions, all patients whose proposed treatment includes neoadjuvant therapy and surgery will undergo a baseline CPX test as part of standard care. Here, eligibility will be assessed. At the next consultation (surgical or oncological outpatient clinic appointment), eligible patients will be approached by the chief investigator (CI) or clinical supervisor (CS) in order to confirm inclusion and exclusion criteria. Patients will at this stage be invited to participate in the study (Appendix 1. Patient information leaflet). If interested, one of the above research team members will explain the study to the patient and give them a copy of the patient information sheet to review. The patient will be given the opportunity to ask any questions they may have about the study and will be given at least 24 hours to consider participation. The research team will emphasise that non-participation will not adversely affect any aspects of their care. The patient will attend for pre-chemotherapy blood tests as part of their standard care pathway. At this time, the patient will be invited to give written consent to the trial. Patients will be informed that they are free to withdraw at any time without giving a reason and again that this will not adversely affect any aspects of their care. If the patient is willing to provide informed consent they will be asked to sign the patient consent form. Consent will be obtained by a suitably qualified person in accordance with international Good Clinical Practice (GCP) guidelines. The patient will be randomised to the intervention (Prehab) or Control group by the consenting clinician (see 'Methodology and Study Design' below).

## Study group

### 1) Prehab group

1  
2  
3  
4  
5 **Exercise intervention:** Over a 15 week period, patients will attend the Human  
6  
7 Performance Institute at Surrey Sports Park for twice weekly one hour exercise  
8  
9 sessions (30 sessions in total) supervised directly by a Clinical Exercise Scientist with  
10  
11 expertise in Cancer Care. A tailored exercise programme will be constructed based on  
12  
13 the patients' baseline CPX test and calculated heart rate reserve. Supervised exercise  
14  
15 will include a balance of aerobic and resistance training consisting of 20 minutes of  
16  
17 cycling at an incremental increase from 40% heart rate reserve (HRR) to 60% HRR  
18  
19 over the duration of the course, with 2x10 repetitions of 6 variable resistance exercises  
20  
21 using a resistance band. Resistance exercises will be scored on a rating of perceived  
22  
23 exertion scale, when the score drops below 12 for a given exercise, the intensity of  
24  
25 resistance will be increased. Patients will also undergo a Home Exercise Plan (HEP)  
26  
27 for one hour, three times a week. The HEP will focus on resistance and core stability  
28  
29 exercises and will be monitored via a patient-maintained diary. Throughout the  
30  
31 duration of the prehabilitation programme, all patients will be asked to wear a Fitbit  
32  
33 Flex2® physical activity monitor on their non-dominant wrist as an objective measure  
34  
35 of background activity. The Clinical Exercise Scientist will record weekly steps at their  
36  
37 supervised exercise sessions. They will also monitor attendance to and exercise  
38  
39 programme adherence at these sessions.  
40  
41  
42  
43  
44  
45

46 **Psychological (Medical Coaching) intervention:** In conjunction with The Fountain  
47  
48 Centre (St Luke's Cancer Centre, Guildford, UK), patients will undergo 6 medical  
49  
50 coaching sessions during their neoadjuvant treatment. The team consists of  
51  
52 professional medical coaches with over 200 hours experience in coaching individuals  
53  
54 with medical conditions. They are accredited with the international and UK coaching  
55  
56  
57  
58  
59  
60

1  
2  
3 bodies, International Coaching Federation (ICF) and National Council of  
4  
5 Psychotherapists (NCP). Sessions will take the following form: Discussion of medical  
6  
7 and health status; strengths recognition; resilience profiling and development; social  
8  
9 and support systems; emotional management; and goal setting.  
10

11  
12  
13 **Nutritional support** will be as per the standard pathway with regular telephone call  
14  
15 and specialist oesophago-gastric dietetic consultations.  
16

## 17 18 19 20 **2) Control group**

21  
22 The control group will not receive a prehabilitation intervention but will be treated  
23  
24 according to the standard OG care pathway. As part of usual care, all patients will be  
25  
26 fully informed to improve fitness levels and to maintain a healthy lifestyle prior to  
27  
28 surgery in order to obtain the best outcomes from high risk surgery. Patients will  
29  
30 continue to be offered standard dietetic and CNS led psychological support as per the  
31  
32 hospital's current cancer pathway and standard of care. Patients will be asked to wear  
33  
34 a Fitbit Flex2® physical activity monitor throughout their preoperative treatment. As an  
35  
36 objective measure of background activity, weekly steps will be recorded by a member  
37  
38 of the study's delegation log.  
39  
40  
41  
42  
43

## 44 **Study outcomes**

45  
46 The primary outcome (change in AT) will be measured by an incremental symptom-  
47  
48 limited CPX test performed by an experienced consultant anaesthetist. All patients  
49  
50 will undergo CPX testing at baseline (before the start of neoadjuvant therapy), 2 weeks  
51  
52 following completion of NAC, and one week prior to surgery.  
53  
54  
55  
56  
57  
58  
59  
60

1  
2  
3 Feasibility will be assessed by monitoring patient attendance at exercise and medical  
4 coaching sessions and adherence to the supervised exercise programme, as well as  
5 patient drop-out. Adherence to home exercise sessions will be monitored by a patient-  
6 reported diary and weekly steps recorded via a Fitbit Flex2® physical activity monitor.  
7  
8  
9

10  
11  
12  
13 Insulin resistance will be measured using the HOMA2 calculation. All patients will  
14 undergo fasting paired insulin and glucose tests at six stages along the protocol  
15 pathway: 1) Before NAC; 2) After cycle 1 of NAC; 3) After cycle 2 of NAC (or if having  
16 chemoradiotherapy, midway through chemoradiotherapy); 4) Following completion of  
17 cycle 3 (or at the end of chemoradiotherapy); 5) At re-staging laparoscopy; and 6) on  
18 the morning of surgical resection. In addition, HbA1c will be measured at baseline and  
19 on the day of oesophagectomy/total gastrectomy.  
20  
21  
22  
23  
24  
25  
26  
27  
28  
29  
30

31 Completion of neoadjuvant therapy will be recorded in conjunction with the patient's  
32 consultant oncologist who will be a member of the trial Delegation Log. Toxicity will be  
33 monitored between cycles and after completion of chemotherapy and will be graded  
34 according to the Common Terminology Criteria for Adverse Events (CTCAE) v5.0: Mild  
35 (Grade 1), moderate (Grade 2), severe (Grade 3), or life-threatening (Grade 4), with  
36 specific parameters according to the organ system involved.  
37  
38  
39  
40  
41  
42  
43  
44  
45

46 Quality of life (QoL) will be assessed at specific time points preoperatively (at the  
47 same time fasting blood tests, see above), and postoperatively at 2 weeks, 6 weeks  
48 and 6 months following hospital discharge. Validated questionnaires will include  
49 EORTC QLQ-C30, EORTC QLQ –OG25, Beck Anxiety Inventory (BAI)), and Beck  
50 Depression Inventory (BDI II).  
51  
52  
53  
54  
55  
56  
57  
58  
59  
60

1  
2  
3  
4  
5 Nutritional assessment will take the form of hand grip strength (HGS), mid-arm muscle  
6 circumference (MAMC), triceps skin-fold thickness (TSFT), and sarcopenia. HGS,  
7 MAMC and TSFT will be measured at the same time points that preoperative blood  
8 tests are taken, HGS will be measure twice daily on postoperative days 1-3 and once  
9 daily on days 4-7. HGS, MAMC and TSFT will be measured postoperatively at 2  
10 weeks, 6 weeks and 6 months following hospital discharge. As part of standard care,  
11 patients undergo staging CT imaging at baseline and following neoadjuvant therapy.  
12 Sarcopenia will be measured using SliceOmatic™ software at these two time points.  
13 At the L3 level, total skeletal muscle (SM), subcutaneous fat and visceral fat will be  
14 measured. Skeletal muscle index (SMI) will be calculated as follows:  $SM/height(m)^2$ .  
15 Measurements will be recorded by two individuals, one of whom will be external to the  
16 Trial Group.  
17  
18  
19  
20  
21  
22  
23  
24  
25  
26  
27  
28  
29  
30  
31  
32

33 Surgery will be performed in a standard manner by three experienced oesophago-  
34 gastric consultants. All patients will spend a period of time on intensive care post-  
35 operatively and will follow a dedicated oesophago-gastric Enhanced Recovery After  
36 Surgery (ERAS) pathway. Length of intensive care and hospital stay will be recorded  
37 as will postoperative complications will be measured using the Clavien-Dindo  
38 classification and as per the Esophagectomy Complications Consensus Group [23].  
39 Mortality will be assessed at 30 days, 90 days and 1 year postoperatively. Figures 1  
40 and 2 demonstrate the flow of patients (Figure 1. Consort diagram) and study  
41 schedule (Figure 2. Study diagram).  
42  
43  
44  
45  
46  
47  
48  
49  
50  
51  
52  
53  
54

55 Figure 1. Consort diagram  
56  
57  
58  
59  
60

1  
2  
3 Figure 2. Study diagram  
4  
5  
6

### 7 **Methodology and study design**

8  
9 This trial will be conducted in a single tertiary referral centre for oesophago-gastric  
10 cancer, with all patients treated and followed up at the Royal Surrey County Hospital,  
11 Guildford UK, in conjunction with St Lukes' Cancer Centre. Full disease staging, a  
12 dedicated oesophago-gastric cancer multi-disciplinary team meeting, and assessment  
13 of eligibility will take place prior to patients being approached by the CI or CS. Patients  
14 will be informed of the trial protocol via face to face discussion and a written Patient  
15 Information Leaflet. On inclusion and formal consent to the trial, patients will be  
16 randomised to receive the intervention (Prehab) or standard care Control).  
17  
18 Randomisation will be carried out by a designated member of staff who is not directly  
19 involved in the study. In order to yield 1 : 1 groups, he or she will use computer  
20 generated variable block randomisation, with the group name ('prehab' or 'control')  
21 placed in sequentially numbered brown opaque envelopes. The envelopes will be kept  
22 in a locked drawer. On consent of a patient to the trial, the next envelope in sequence  
23 will be handed to the CI who will open the envelope in front of the patient. Due to the  
24 nature of the intervention, the research team and trial participants will not be blinded to  
25 the assigned arm of the trial. Outcome measures are described in detail above.  
26  
27  
28  
29  
30  
31  
32  
33  
34  
35  
36  
37  
38  
39  
40  
41  
42  
43  
44  
45

### 46 **Statistical considerations**

47  
48  
49  
50 Estimation of sample size

51  
52 It has been shown that AT improves following neoadjuvant chemotherapy as a result  
53 of a prehabilitation programme compared with standard care, with an AT difference of  
54  
55  
56  
57  
58  
59  
60



1  
2  
3 2.12ml/kg/min between Prehab and Control groups [16].  
4  
5

6  
7 To achieve a power of 80% and a significance level of 5% and to allow for confounding  
8 factors in a post-chemotherapy population, we calculate that 48 patients (24 per  
9 group) need to be studied in order to detect an AT difference of 2ml/kg/min between  
10 Prehab and Control group subjects. To allow for a 20% patient drop-out rate (due to  
11 non-compliance or side effects from chemotherapy), 29 patients will be required for  
12 each treatment group resulting in a total accrual of 58.  
13  
14  
15  
16  
17  
18  
19  
20  
21

## 22 Statistical analysis

23  
24 Data will be analysed on an intention to treat basis using SPSS software (v24). With  
25 the exception of interim analysis, a *p* value of <0.05 will be considered significant.  
26  
27

28 Normality of data will be determined by using the Shapiro-Wilk test. Baseline  
29 characteristics for the two groups will be compared and demonstrated using mean [+/-  
30 standard deviation] or the median (with interquartile range) for continuous data. A  
31 mixed-measure analysis of variance (ANOVA) will be employed for the primary  
32 outcome of AT as this will be recorded at three times points (baseline, 2 weeks  
33 following neoadjuvant therapy, and 1 week prior to surgery). An unpaired Student's *t*  
34 test will compare AT and peak VO<sub>2</sub> peak between the intervention (prehab) and control  
35 groups. Secondary outcomes including length of hospital stay, grip strength, quality of  
36 life, Fitbit® data etc., will also be analysed using a Student's *t* test or Mann-Whitney U  
37 test. Survival data will be determined using the Kaplan-Meier curve. Interim analysis  
38 will be performed once primary outcome data is available for 26 subjects.  
39  
40  
41  
42  
43  
44  
45  
46  
47  
48  
49  
50  
51  
52  
53  
54  
55  
56  
57  
58  
59  
60

## **Patient and Public Involvement**

The CI attended the Oesophageal Patient Association Support Group to engage and empower patients to help decide upon the programme from previous experiences. All members were fully engaged, enthusiastic. Patient experience helped shape the study design, in particular regarding the frequency of researcher and patient interaction, and number of scheduled exercise sessions.

At the time of consent, all patients will be asked whether they would like to receive a copy of the trial results. If they initial this box, they will be emailed or posted (as per the patient's preference) a copy of the completed manuscript.

Once the patient has completed the programme, the burden of the intervention will be assessed by patients themselves through the use of a questionnaire.

## **Discussion**

Neoadjuvant therapy prior to oesophago-gastric resection is the gold standard of care for patients with T2 and/or nodal disease. Despite this, studies have taught us that chemotherapy decreases a patients' functional capacity. We aim to show that a multimodal prehabilitation programme will physically and psychologically optimise these patients, during and after neoadjuvant therapy, prior to major elective OG cancer surgery so they may better withstand the immense physical and metabolic stress placed upon them by radical surgery.

## **Ethics and Dissemination**

## Approval

In accordance with the Declaration of Helsinki, the trial was presented to an independent Research Ethics Committee, the London-Bromley Research Ethics Committee. Authorisation was obtained from the NHS Health Research Authority on 16<sup>th</sup> November 2016. Any substantial amendment to the protocol or consent form will be presented to the local Research and Development team and independent Research Ethics Committee. Likewise, all serious adverse events (AE) will be reported to the local Research and Development team as well as the independent Research Ethics Committee. The study is registered on the Clinical Trials website, ClinicalTrials.gov, under the number NCT02950324. The study is sponsored by The Royal Surrey County Hospital NHS Foundation Trust and funded by Macmillan Cancer Support. The sponsorship from Macmillan Cancer Support will fund the following: Exercise sessions at Surrey Sports Park, psychological support in the form of Medical Coaching, fasting blood tests, and the Fitbit Flex2® physical activity monitors.

## Patient informed consent

As per international principles, written informed consent (Appendix 2. Consent form) will be obtained from patients prior to their participation in the trial once they voluntarily confirm their understanding and willingness to participate in the trial at least 24 hours after verbal and written information has been provided and questions answered.

Consent will be obtained by a suitably qualified person in accordance with international Good Clinical Practice (GCP) guidelines. Patients will be informed that they are free to withdraw from the trial at any time without giving a reason and they will be informed that this will not adversely affect any aspects of their care.

## **Data collection and quality management**

All data will be collected, handled and stored securely in the Trial Site File only by experienced persons who have been suitably trained in Good Clinical Practice and who are a member of the trial Delegation Log. At the time of patient contact, data will be acquired using a paper case report form (CRF). All study data will be anonymised by using a unique study number assigned to each subject sequentially. CRFs will be stored in a locked cabinet within a locked drawer of the secure (card-access only) Research Department. Collated data will be maintained on a pre-defined confidentially stored and password protected electronic spreadsheet with access granted only to the CI, CS and Sponsor. Data will be kept for five years following recruitment of the final patient. The trial does not warrant a Data Monitoring Committee due to its short interventional duration and minimal associated risks, however trial data will be regularly monitored and audited at regular intervals by the Sponsor and local R&D department in accordance with the University of Surrey Research Department, and Good Clinical Practice policies.

## **Access to data and dissemination of results**

The Chief Investigator and Clinical Supervisor will have full access to the completed data set, as will the trial's Sponsor. Final data will be summarised on ClinicalTrials.gov, published in a peer-reviewed journal, and presented at international conferences.

## **Trial status**

The trial protocol (v1.2 14/10/2016) was presented to an independent Research Ethics Committee, the London-Bromley Research Ethics Committee. Authorisation was

1  
2  
3 obtained from the NHS Health Research Authority on 16<sup>th</sup> November 2016.  
4  
5 Recruitment started on 15/12/16. To date, 43 patients have been recruited. Six  
6  
7 patients have been lost to follow-up. Interim analysis will be performed once primary  
8  
9 outcome data (change anaerobic threshold) is available for 26 subjects (13 per group).  
10  
11 Recruitment will be completed by 1/6/18.  
12  
13  
14  
15

## 16 References

- 17  
18  
19  
20 [1] Cunningham D, Allum WH, Stenning SP, et al. Perioperative chemotherapy versus  
21 surgery alone for resectable gastroesophageal cancer. *N Eng J Med* 2006;355[1]:11  
22  
23 [2] Allum WH, Stenning SP, Bancewicz J et al. Long-term results of a randomized trial  
24 of surgery with or without preoperative chemotherapy in esophageal cancer. *J Clin*  
25  
26 *Oncol* 2009;27(30):5062-5067  
27  
28 [3] Ychou M, Boige V, Pignon J-P et al. Perioperative chemotherapy compared with  
29 surgery alone for resectable gastroesophageal adenocarcinoma: An FNCLCC and  
30  
31 FFCD multicenter III trial. *J Clin Oncol* 2011;29[13]:1715-1721  
32  
33 [4] Schumacher C, Gretschel S, Lordick F et al. Neoadjuvant chemotherapy compared  
34 with surgery alone for locally advanced cancer of the stomach and cardia: European  
35  
36 Organisation for Research and Treatment of Cancer randomized trial 40954. *J Clin*  
37  
38 *Oncol* 2010;28[35]:5210-5218  
39  
40 [5] Keegan N, Keane F, Cuffe S et al. ICORG 10-14: Neo-AEGIS: A randomized  
41  
42 clinical trial of neoadjuvant and adjuvant chemotherapy [modified MAGIC regimen]  
43  
44 versus neoadjuvant chemoradiation [CROSS protocol] in adenocarcinoma of the  
45  
46 esophagus and esophagogastric junction. *J Clin Oncol* 2014;32[5s]  
47  
48  
49  
50  
51  
52  
53  
54  
55  
56  
57  
58  
59  
60

- 1  
2  
3 [6] Shapiro J, van Lanschot J, Hulshof M et al. Neoadjuvant chemoradiotherapy plus  
4 surgery versus surgery alone for oesophageal or junctional cancer [CROSS]: long  
5 term results of a randomised controlled trial. *The Lancet* 2015;16:1090-1098  
6  
7  
8  
9 [7] Blencowe N, Strong S, McNair A et al. Reporting of short-term clinical outcomes  
10 after esophagectomy: A systematic review. *Ann Surg* 2012;255[4]:658-666  
11  
12  
13 [8] West MA, Lythgoe D, Barben CP, et al. Cardiopulmonary exercise variables are  
14 associated with postoperative morbidity after major colonic surgery: a prospective  
15 blinded observational study. *Br J Anaesth* 2014;112[4]:665e71  
16  
17  
18 [9] West MA, Parry MG, Lythgoe D, et al. Cardiopulmonary exercise testing for the  
19 prediction of morbidity risk after rectal cancer surgery. *Br J Surg*. 2015;114[2]:244e51  
20  
21  
22 [10] Moran J, Wilson F, Guinan E, et al. Role of cardiopulmonary exercise testing as a  
23 risk-assessment method in patients undergoing intra-abdominal surgery: a systematic  
24 review. *Br J Anaesth* 2016;116[2]:177e91  
25  
26  
27 [11] West MA, Asher R, Browning M, et al. Validation of preoperative cardiopulmonary  
28 exercise testing-derived variables to predict in-hospital morbidity after major colorectal  
29 surgery. *Br J Surg* 2016; 103(6): 744-752  
30  
31  
32 [12] Jack S, West MA, Raw D, et al. The effect of neoadjuvant chemotherapy on  
33 physical fitness and survival in patients undergoing oesophagogastric cancer surgery.  
34 *EJSO* 2014; 40: 1313-1320  
35  
36  
37 [13] O'Doherty A, West M, Jack S et al. Preoperative aerobic exercise training in  
38 elective intra-cavity surgery: a systematic review. *Br J Anaesth* 2013 110[5]: 679-689  
39  
40  
41 [14] Dunne D, Jack S, Joens R et al. Randomized clinical trial of prehabilitation before  
42 planned liver resection. *Br J Surg* 2016; 103: 504-512  
43  
44  
45 [15] Holloszy JO, Coyle EF. Adaptations of skeletal muscle to endurance exercise and  
46 their metabolic consequences. *J Appl Physiol* 1984; 5(4): 831-838  
47  
48  
49  
50  
51  
52  
53  
54  
55  
56  
57  
58  
59  
60

- 1  
2  
3 [16] West MA, Loughney L, Lythgoe et al. Effect of prehabilitation on objectively  
4 measured physical fitness after neoadjuvant treatment in preoperative rectal cancer  
5 patients: a blinded interventional pilot study. *Br J Anaesth* 2015; 2: 244-251  
6  
7  
8  
9 [17] Heldens A, Bongers BC, de Vos-Geelen J et al. Feasibility and preliminary  
10 effectiveness of a physical exercise training program during neoadjuvant  
11 chemoradiotherapy in individual patients with rectal cancer prior to major elective  
12 surgery. *EJSO* 2016; 42: 1322-1330  
13  
14  
15  
16 [18] Tsimopoulou J, Pasquali S, Howard R et al. Psychological prehabilitation before  
17 cancer surgery: A systematic review. *Ann Surg Oncol* 2015; 22: 4117-4123  
18  
19  
20  
21 [19] Sato H, Carvalho G, Sato T et al. The association of preoperative glycaemic  
22 control, intraoperative insulin sensitivity, and outcomes after cardiac surgery. *J Clin*  
23 *Endocrinol Metab* 2010; 95(9): 4338-4344  
24  
25  
26  
27 [20] Ljungqvist O, Nygren J, Soop M, et al. Metabolic perioperative management:  
28 novel concepts. *Curr Opin Crit Care* 2005; 11: 295-299  
29  
30  
31  
32 [21] Yip C, Davies A, Gossage A et al. Assessment of sarcopenia and changes in  
33 body composition after neoadjuvant chemotherapy and associations with clinical  
34 outcomes in oesophageal cancer. *Eur Radiol* 2014; 24: 998-1005  
35  
36  
37  
38 [22] Paireder M, Asari R, Kristo I et al. Impact of sarcopenia on outcome in patients  
39 with esophageal resection following neoadjuvant chemotherapy for esophageal  
40 cancer. *EJSO* 2017; 43: 478-484  
41  
42  
43  
44 [23] Low D, Alderson D, Cecconello I et al. International consensus on standardization  
45 of data collection for complications associated with esophagectomy: Esophagectomy  
46 Complications Consensus Group [ECCG]. *Ann Surg* 2015; 262(2): 286-294  
47  
48  
49  
50  
51  
52  
53  
54

#### **Authors statement**

55  
56  
57  
58  
59  
60

1  
2  
3  
4  
5 Sophie Allen, Vanessa Brown, Michael Scott, Pradeep Prabhu, Timothy Rockall,  
6  
7 Shaun Preston and Javed Sultan have all: Made substantial contributions to  
8  
9 conception and design, or acquisition of data, or analysis and interpretation of data;  
10  
11 Have been involved in drafting the manuscript or revising it critically for important  
12  
13 intellectual content; Have given final approval of the version to be published and has  
14  
15 participated sufficiently in the work to take public responsibility for appropriate portions  
16  
17 of the content and have agreed to be accountable for all aspects of the work in  
18  
19 ensuring that questions related to the accuracy or integrity of any part of the work are  
20  
21 appropriately investigated and resolved.  
22  
23  
24  
25

26 The trial management committee (SA and JS) will be responsible for the following:  
27  
28 Organisation of steering committee meetings; the trial site file; randomisation  
29  
30 (performed by a person external to the trial); budget administration and liaising with the  
31  
32 funding source and Sponsor; reporting of adverse events; completion of CRFs;  
33  
34 identification and recruitment of patients; adherence to the study protocol; and  
35  
36 publication of study results. The steering committee (SA/VB/PP/SP/TR/JS) were in  
37  
38 agreement of the final protocol and will review the progress of the study, liaising with  
39  
40 the CI to ensure the study runs smoothly.  
41  
42  
43  
44  
45

#### 46 **Funding**

47  
48  
49

50 This work is supported by Macmillan Cancer Support, Grant number 5227431  
51  
52 (received 25/6/15) and Grant number 5635161 (received 25/10/16).  
53  
54  
55  
56  
57  
58  
59  
60



1  
2  
3 The funding body are responsible for funding participant participation at Surrey Sports  
4 Park, all Medical Coaching sessions, the use of Fitbit® physical activity monitors, the  
5 cost of fasting glucose and insulin blood tests, and the CPX test. This funding source  
6 had no role in the design of this study and will not be involved in analysis of the  
7 results, interpretation of data, or decision to submit results.  
8  
9  
10  
11  
12

### 13 14 15 **BMJ Group declaration of interests statement**

16  
17  
18 I have read and understood the BMJ Group Policy on declaration of interests and  
19 declare the following interests: None  
20  
21

22  
23  
24 Name: Sophie K Allen Date: 2/3/18  
25  
26  
27

### 28 29 **Acknowledgments**

30  
31  
32  
33 The authors thank the following for their contributions to this study protocol: Mohamad  
34 Atie<sup>1</sup>, Lucy-Ann Bett<sup>4</sup>, Sebastian Cummins<sup>1</sup>, Shirley Edghill<sup>4</sup>, Lizzie Elam<sup>1</sup>, Annabelle  
35 Emery<sup>3</sup>, Alice Extance<sup>1</sup>, Madeleine Hewish<sup>1</sup>, Emily Hodge<sup>5</sup>, Fiona Huddy<sup>1</sup>, Marianne  
36 Illsley<sup>1</sup>, Alice Kidd<sup>1</sup>, David King<sup>3</sup>, Aga Kehinde<sup>5</sup>, Anna McGuire<sup>1</sup>, Ajay Mehta<sup>1</sup>, Sarah  
37 Oakes<sup>1</sup>, Anne Pike<sup>5</sup>, Natalie Silverdale<sup>5</sup>, Sukhpal Singh<sup>2</sup>, David Timbrell<sup>1</sup>, Mary  
38 Townsend<sup>2</sup>, Lizzie Underhill<sup>2</sup>, Joe Wainwright<sup>3</sup> Naomi Westran<sup>1</sup>, Minimal Access  
39 Therapy Training Unit (MATTU) Guildford, The Oesophageal Patient Association  
40 Support Group  
41  
42  
43  
44  
45  
46  
47  
48  
49

50  
51 <sup>1</sup> The Royal Surrey County Hospital NHS Foundation Trust

52  
53 <sup>2</sup> Frimley Park Hospital

54  
55 <sup>3</sup> Human Performance Institute, Surrey Sports Park  
56  
57  
58  
59  
60

1  
2  
3 <sup>4</sup>Macmillan Cancer Support

4  
5 <sup>5</sup>The Fountain Centre, St Lukes Cancer Centre

6  
7  
8  
9 **Sponsor**

10 Sarah Martin

11 Research, Development and Innovations Manager

12 Leggett Building

13 Manor Park

14 Guildford

15 GU2 7WG

16  
17  
18  
19  
20  
21  
22  
23  
24  
25  
26 **List of figures**

27  
28  
29  
30  
31 Figure 1. Consort diagram

32  
33 Figure 2. Study diagram

34  
35  
36  
37 **Appendix**

38  
39  
40  
41 Appendix 1. Patient information leaflet

42  
43 Appendix 2. Consent form

44  
45  
46  
47 **List of abbreviations**

48  
49  
50  
51 AE – Adverse event

52  
53 AT – Anaerobic threshold

54  
55  
56 CI – Chief investigator

1  
2  
3 CNS – Clinical nurse specialist  
4  
5 CS – Clinical Supervisor  
6  
7 CPX test – Cardiopulmonary Exercise Test  
8  
9 CRF – Case report form  
10  
11 GCP – Good Clinical Practice  
12  
13 HEP – Home exercise plan  
14  
15 HOMA2 – Homeostasis model assessment  
16  
17 HRR – Heart rate reserve  
18  
19 ICF - International Coaching Federation  
20  
21 IR – Insulin Resistance  
22  
23 MDT - Multi-disciplinary Team  
24  
25 NAC – Neo-adjuvant chemotherapy  
26  
27 NCP - National Council of Psychotherapists  
28  
29 OGCS – Oesophago-gastric cancer surgery  
30  
31 POMS – Post-operative morbidity score  
32  
33 Prehab – Prehabilitation  
34  
35 RSCH – Royal Surrey County Hospital  
36  
37 VO<sub>2</sub> peak – Peak oxygen uptake  
38  
39  
40  
41  
42  
43  
44  
45  
46  
47  
48  
49  
50  
51  
52  
53  
54  
55  
56  
57  
58  
59  
60

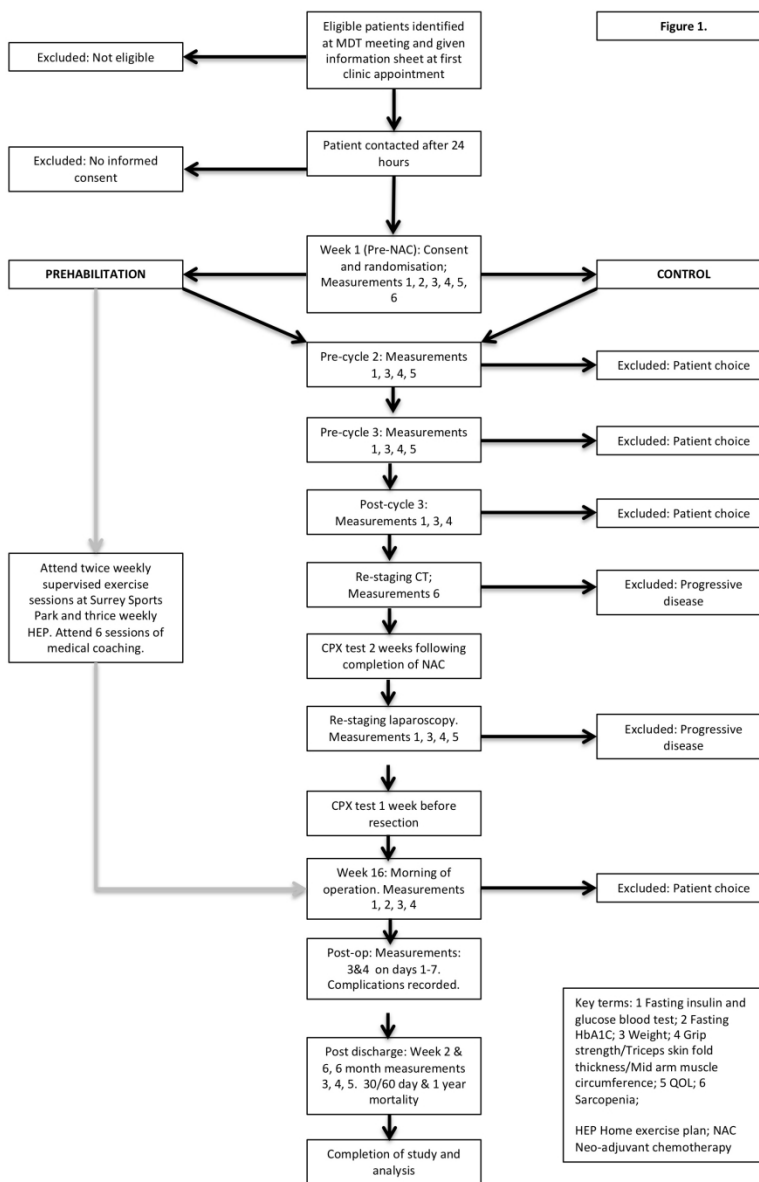

Figure 1. Consort diagram

190x254mm (300 x 300 DPI)

1  
2  
3  
4  
5  
6  
7  
8  
9  
10  
11  
12  
13  
14  
15  
16  
17  
18  
19  
20  
21  
22  
23  
24  
25  
26  
27  
28  
29  
30  
31  
32  
33  
34  
35  
36  
37  
38  
39  
40  
41  
42  
43  
44  
45  
46  
47  
48  
49  
50  
51  
52  
53  
54  
55  
56  
57  
58  
59  
60

|                              | Enrollment and Allocation |        |        |         |         |         | Surgery | Follow up |         |                  |                   |                   |                    |                       |                                   |
|------------------------------|---------------------------|--------|--------|---------|---------|---------|---------|-----------|---------|------------------|-------------------|-------------------|--------------------|-----------------------|-----------------------------------|
|                              | Week 1                    | Week 4 | Week 7 | Week 10 | Week 12 | Week 13 |         | Week 15   | Week 16 | Days 1-7 post-op | 2 weeks discharge | 6 weeks discharge | 6 months discharge | 1 year post discharge | Close-out (1 year post discharge) |
| Timepoint                    | X                         |        |        |         |         |         |         |           |         |                  |                   |                   |                    |                       |                                   |
| Eligibility screen           | X                         |        |        |         |         |         |         |           |         |                  |                   |                   |                    |                       |                                   |
| Informed consent             | X                         |        |        |         |         |         |         |           |         |                  |                   |                   |                    |                       |                                   |
| Randomisation and allocation | X                         |        |        |         |         |         |         |           |         |                  |                   |                   |                    |                       |                                   |
| Interventions:               |                           |        |        |         |         |         |         |           |         |                  |                   |                   |                    |                       |                                   |
| Prehab                       | X                         | X      | X      | X       | X       | X       | X       | X         | X       | X                | X                 | X                 | X                  | X                     | X                                 |
| Control                      | X                         | X      | X      | X       | X       | X       | X       | X         | X       | X                | X                 | X                 | X                  | X                     | X                                 |
| Assessments:                 |                           |        |        |         |         |         |         |           |         |                  |                   |                   |                    |                       |                                   |
| CPX (AT and peak VO2)        | X                         |        |        |         |         |         | X       |           |         |                  |                   |                   |                    |                       |                                   |
| Sarcomera assessment         | X                         |        |        |         |         |         | X       |           |         |                  |                   |                   |                    |                       |                                   |
| Weight                       | X                         | X      | X      | X       | X       | X       | X       | X         | X       | X                | X                 | X                 | X                  | X                     | X                                 |
| Fasting HbA1c                | X                         | X      | X      | X       | X       | X       | X       | X         | X       | X                | X                 | X                 | X                  | X                     | X                                 |
| Fasting insulin and glucose  | X                         | X      | X      | X       | X       | X       | X       | X         | X       | X                | X                 | X                 | X                  | X                     | X                                 |
| Grip strength                | X                         | X      | X      | X       | X       | X       | X       | X         | X       | X                | X                 | X                 | X                  | X                     | X                                 |
| TSFT                         | X                         | X      | X      | X       | X       | X       | X       | X         | X       | X                | X                 | X                 | X                  | X                     | X                                 |
| MAMC                         | X                         | X      | X      | X       | X       | X       | X       | X         | X       | X                | X                 | X                 | X                  | X                     | X                                 |
| DOL                          | X                         | X      | X      | X       | X       | X       | X       | X         | X       | X                | X                 | X                 | X                  | X                     | X                                 |
| Complications                |                           |        |        |         |         |         |         |           |         |                  |                   |                   |                    |                       |                                   |
| Mortality                    |                           |        |        |         |         |         |         |           |         |                  |                   |                   |                    |                       |                                   |
| Analysis                     |                           |        |        |         |         |         |         |           |         |                  |                   |                   |                    |                       | X                                 |

Figure 2. Study diagram  
 • TSFT: Triceps skin fold thickness; MAMC: Mid arm muscle circumference

Figure 2. Study diagram  
 209x296mm (300 x 300 DPI)

(Chemotherapy)

## Patient information leaflet

### Does prehabilitation improve cardiopulmonary exercise performance and reduce insulin resistance in patients undergoing neoadjuvant treatment and surgery for oesophagogastric cancer

Mr Javed Sultan, Consultant Surgeon  
 Professor Timothy Rockall, Professor of Surgery  
 Dr Julie Hunt, Lecturer in Sport and Exercise Sciences  
 Professor Mike Scott, Consultant Anaesthetist  
 Miss Sophie Allen, Research Fellow, Principal Investigator

“Does exercise improve exercise test results and recovery after surgery in people with oesophagogastric cancer?”

#### Invitation to participate

You are being invited to take part in a research study. Before you decide, it is important for you to understand why the research is being done and what it will involve. This information sheet is designed to help you decide whether you would like to participate in this study. Please take time to read the following information carefully and discuss it with others if you wish. Ask us if there is anything that is not clear or if you would like more information. Take time to decide whether or not you wish to take part.

Thank you for reading this.

#### What is the purpose of the study?

Recent studies have shown that regular supervised exercise (prehabilitation) can improve patients' fitness prior to surgery, improve the way their body handles sugar and improve their recovery after surgery. Cardiopulmonary exercise (CPX) testing measures the function of your heart and lungs in response to exercise (see separate information leaflet 'Your Cardio Pulmonary Exercise test'). Studies have shown that the better your CPX result, the less likely you are to have complications after a big operation.

The aim of this study is to see if regular supervised exercise (prehabilitation) improves performance in CPX and recovery after surgery. The study will last up to approximately 22 weeks in total.

1.

**Does prehabilitation improve cardiopulmonary exercise performance in patients undergoing neoadjuvant treatment and surgery for oesophagogastric cancer**

(REC 16/LO/1702, R+D 16SURN213028, NCT, IRAS ID 213028)

For peer review only - <http://bmjopen.bmj.com/site/about/guidelines.xhtml> Version 3.1 13/10/2017

(Chemotherapy)

### Why have I been chosen?

You have been invited to take part in the study because you have a diagnosis of oesophago-gastric cancer, are having chemotherapy prior to surgery, and fit the required criteria. Approximately 50 people will be observed and tested in this study.

### Do I have to take part?

It is up to you to decide whether or not to take part. If you do decide to take part you will be asked to sign a consent form. If you decide to take part you are still free to withdraw at any time and without giving a reason. A decision to withdraw at any time, or a decision not to take part, will not affect the standard of care you receive.

### What will happen to me if I take part?

The study will last up to approximately 22 weeks. You will be given this information sheet to read and take away today. When you attend for your blood tests before your oncology appointment we will answer any questions you have and ask you if you would like to take part in the study.

If you agree to take part in the study we will check your weight, height, grip strength, arm circumference and skin thickness. You will be issued with a Fitbit physical activity monitor. This small device is worn on your wrist and records your physical activity. We will demonstrate how to use the device and provide written instructions. After this visit we will ask you to wear the Fitbit on your wrist continuously during chemotherapy and in the lead up to your operation.

All patients will be referred to a dietician for dietary advice.

### What happens next?

The study involves being randomly entered into one of two study groups. The groups will be randomly selected by computer (a bit like tossing a coin), so you cannot choose which group you are in. You will not know which group you are in before consenting to take part in the study.

You will have a one in two chance of being randomised into either the standard care group or intervention.

2.

**Does prehabilitation improve cardiopulmonary exercise performance in patients undergoing neoadjuvant treatment and surgery for oesophagogastric cancer**

(REC 16/LO/1702, R+D 16SURN213028, NCT, IRAS ID 213028)

For peer review only - <http://bmjopen.bmj.com/site/about/guidelines.xhtml> Version 3.1 13/10/2017

(Chemotherapy)

**All participants in the trial will be asked to complete the following assessments in addition to their usual treatment pathway-**

- Week 1 (When you have blood tests before your oncology appointment)
  - Alongside your usual blood tests, we will perform 3 additional blood tests using an extra 10mls of blood. We will ask you to fast (not eat any food after midnight the night before but you may drink water).
  - You will be issued with a Fitbit physical activity monitor.
  - We will measure your weight, height, grip strength, arm circumference and skin thickness.
  - We will ask you to fill out a short questionnaire about your wellbeing.
- Week 5 (At the end of your first cycle of chemotherapy)
  - Please fast before your usual blood tests. Alongside your usual blood tests, we will perform 2 additional blood tests using an extra 10mls of blood.
- Week 8 (At the end of your second cycle of chemotherapy)
  - Please fast before your usual blood tests. Alongside your usual blood tests, we will perform 2 additional blood tests using an extra 10mls of blood.
  - We will check your weight, grip strength, arm circumference and skin thickness.
  - We will ask you to fill out a short questionnaire about your wellbeing.
- Week 11 (At the end of your third cycle of chemotherapy)
  - Please fast before your usual blood tests. Alongside your usual blood tests, we will perform 2 additional blood tests using an extra 10mls of blood.
  - We will ask you to perform a routine standard second CPX test. You may eat before this, once you have had your blood test.
  - We will check your weight, grip strength, arm circumference and skin thickness.
  - We will ask you to fill out a short questionnaire about your wellbeing.
- Approximately Week 13 (at the time of your repeat staging laparoscopy)
  - Please fast before your usual blood tests. Alongside your usual blood tests, we will perform 2 additional blood tests using an extra 10mls of blood.
  - We will check your weight, grip strength, arm circumference and skin thickness.
  - We will ask you to fill out a short questionnaire about your wellbeing.
  - **We will ask you to perform a third extra CPX test approximately one week before your operation.** You may eat before this, once you have had your blood test.

3.

**Does prehabilitation improve cardiopulmonary exercise performance in patients undergoing neoadjuvant treatment and surgery for oesophagogastric cancer**

(REC 16/LO/1702, R+D 16SURN213028, NCT, IRAS ID 213028)

Version 3.1 13/10/2017

For peer review only - <http://bmjopen.bmj.com/site/about/guidelines.xhtml>



(Chemotherapy)

- 1
- 2
- 3
- 4 • Week 18 (The morning of your operation)
- 5     • We will perform 3 extra blood tests using an extra 10mls of blood.
- 6     • We will check your weight, grip strength, arm circumference and skin
- 7         thickness.
- 8     • At the time of the operation we may take a sample of the tumour which
- 9         will be saved for later analysis.
- 10
- 11
- 12

13 **After the surgery** your skin fold thickness and arm circumference will be measured  
14 days 1, 3 and 7 post-surgery. Your grip strength will be measured twice a day for the  
15 first 3 days then once a day for a further 4 days. We will monitor your routine blood  
16 tests on days 1, 3 and 7 after your operation. You will also be weighed on days 1, 3  
17 and 7. To help assess your nutritional status, the CT scans that you will have had as  
18 part of your usual care will be used to assess your muscle density.  
19

20  
21  
22  
23 **After you are discharged** you will be asked to fill in a short questionnaire about your  
24 wellbeing at 2 weeks, 6 weeks, and 6 months after surgery. We will also test your  
25 grip strength, skin thickness, and arm circumference. Other information from your  
26 medical notes will be captured approximately 90 days and one year after your  
27 operation.  
28  
29  
30  
31  
32  
33  
34  
35  
36  
37  
38  
39  
40  
41  
42  
43  
44  
45  
46  
47  
48  
49  
50  
51  
52  
53  
54  
55  
56  
57  
58  
59  
60

4.

**Does prehabilitation improve cardiopulmonary exercise performance in patients undergoing  
neoadjuvant treatment and surgery for oesophagogastric cancer**

(REC 16/LO/1702, R+D 16SURN213028, NCT, IRAS ID 213028)

For peer review only - <http://bmjopen.bmj.com/site/about/guidelines.xhtml> Version 3.1 13/10/2017

(Chemotherapy)

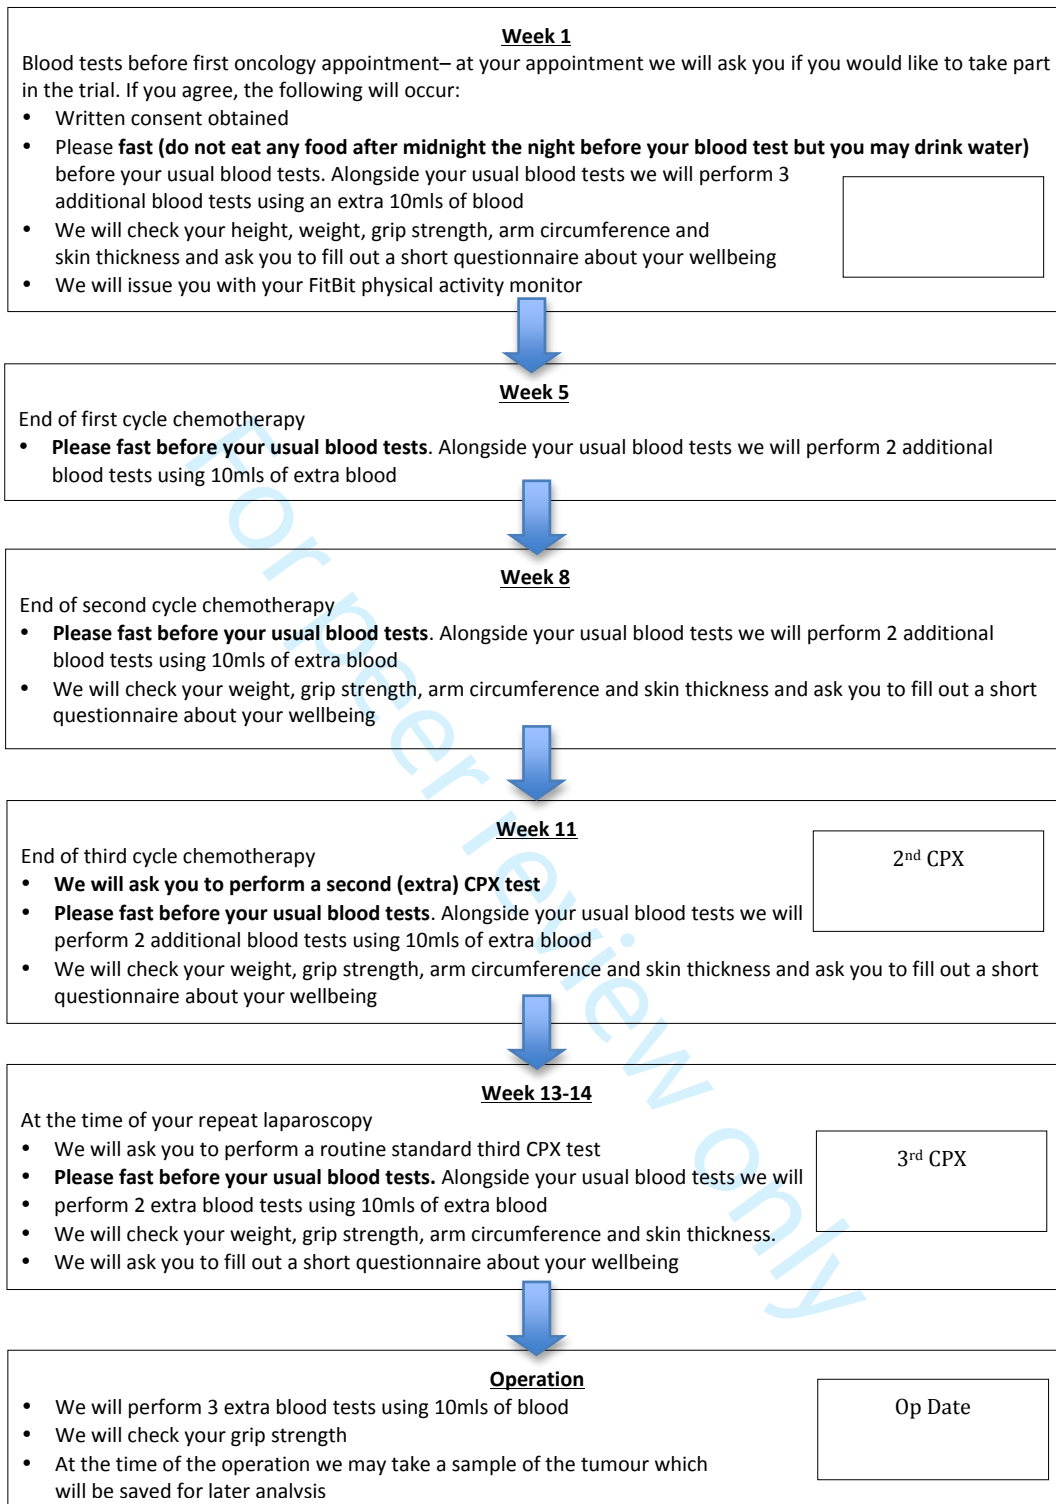

5.

**Does prehabilitation improve cardiopulmonary exercise performance in patients undergoing neoadjuvant treatment and surgery for oesophagogastric cancer**

(REC 16/LO/1702, R+D 16SURN213028, NCT, IRAS ID 213028)

Version 3.1 13/10/2017

(Chemotherapy)

1  
2  
3  
4  
5  
6  
7  
8  
9  
10  
11  
12  
13  
14  
15  
16  
17  
18  
19  
20  
21  
22  
23  
24  
25  
26  
27  
28  
29  
30  
31  
32  
33  
34  
35  
36  
37  
38  
39  
40  
41  
42  
43  
44  
45  
46  
47  
48  
49  
50  
51  
52  
53  
54  
55  
56  
57  
58  
59  
60

**INTERVENTION ARM ONLY**

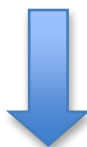

**Personal Trainer Week 2-17**

We will invite you to the Surrey Sports Park where you will meet with a Personal Trainer

- Attend twice weekly Personal Training sessions for 15 weeks
- Home exercise plan to complete for one hour, three times a week
- Fill out a food and exercise diary

Initial assessment

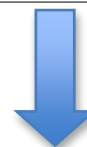

**Medical Coaching sessions**

Six sessions in total which will be arranged to coincide with your existing appointments

- Session 2 / 3 will be during chemotherapy
- Sessions 4 / 5 will be after chemotherapy
- The final session will be a week before surgery

|                    |           |               |
|--------------------|-----------|---------------|
| Initial assessment | Session 2 | Session 3     |
| Session 4          | Session 5 | Final session |

6.

**Does prehabilitation improve cardiopulmonary exercise performance in patients undergoing neoadjuvant treatment and surgery for oesophagogastric cancer**

(REC 16/LO/1702, R+D 16SURN213028, NCT, IRAS ID 213028)

Version 3.1 13/10/2017

(Chemotherapy)

**Group 1** is called the **Standard Care group**. If you are in this group we will perform one extra exercise test to monitor your fitness, monitor your physical activity via the Fitbit, and perform the extra tests mentioned above (eg blood tests, measurement of your grip strength, arm circumference, and skin thickness, and also short questionnaires about your wellbeing). This is in addition to your usual care. Psychological support at The Fountain Centre will be available.

**Group 2** is the **Intervention Group**. If you are in this group we will perform one extra exercise test to monitor your fitness, monitor your physical activity via the Fitbit, and perform the above extra interventions in addition to your usual care. We will also invite you to the Surrey Sports Park where you will meet with a Personal Trainer. They will design a 15 week fitness programme and you will be asked to attend twice weekly Personal Training sessions for 15 weeks. You will be given a home exercise plan to complete for one hour, three times a week. Some participants in this group may not be able to complete the exercise program and if this is the case, you should not feel that you have failed, and your treatment will not be affected. If you are in this group you may also find it possible to do exercise one week and not another. Your personal trainer will be aware of this and you should discuss this with them. In addition to the exercise sessions, you will be asked to fill out a food diary.

Please see page 4-5 for a detailed flow chart of what will happen to you during the study. You will be supported along the way by the research team and your specialist nurse.

You will not be expected to need to visit the GP more often during the study.

### **Will I be given any emotional and psychological support?**

Being diagnosed with cancer can be both stressful and emotional. Emotions and needs experienced by people with cancer are diverse and individual. The Fountain Centre is a drop-in centre within St Luke's Cancer Centre at the Royal Surrey County Hospital that offers support and one-to-one counselling to patients who are under the care of a Royal Surrey County Hospital consultant. The counsellors work confidentially with patients over a short or long term period to establish a non-judgmental working relationship to support the patient and enhance their wellbeing. **All** patients participating in this study are strongly advised to seek support offered by The Fountain Centre.

**The intervention group** will be asked to attend medical coaching sessions at The Fountain Centre. There will be six sessions in total, which will be arranged to coincide with your existing appointments. You will have an initial assessment, two

7.

**Does prehabilitation improve cardiopulmonary exercise performance in patients undergoing neoadjuvant treatment and surgery for oesophagogastric cancer**

(REC 16/LO/1702, R+D 16SURN213028, NCT, IRAS ID 213028)

For peer review only - <http://bmjopen.bmj.com/site/about/guidelines.xhtml> Version 3.1 13/10/2017

(Chemotherapy)

1  
2  
3 sessions during treatment, two sessions after treatment, and a final session the  
4 week prior to surgery.  
5  
6  
7

### 8 **What are my responsibilities? (all patients)**

- 9 • Wear the Fitbit on your wrist continuously.
  - 10 • Attend for one extra exercise test (CPX).
  - 11 • Fast (we will ask you to not eat any food after midnight the night before your  
12 blood test but you may drink water) before your usual blood tests. We will  
13 try to get an appointment as early in the morning as possible in order to limit  
14 the time you have to fast.
  - 15 • Have an additional 10mls of blood taken when you have your usual blood  
16 tests and one extra blood test on the day of the operation.
  - 17 • Fill out a short questionnaire about your wellbeing when requested.
  - 18 • If you are in the **intervention group**:
    - 19 • Attend the Surrey Sports Park twice a week for 15 weeks
    - 20 • Attend medical coaching six times
- 21  
22  
23  
24  
25  
26  
27

28 You can drive and take part in sport as normal. You should continue to take your  
29 regular medication unless we specifically advise you otherwise.

30 You should not donate blood in the study period as this may change the results of  
31 your exercise test.  
32  
33  
34

### 35 **What is the drug or procedure that is being tested?**

36 We are testing whether regular supervised exercise (prehabilitation) during  
37 chemotherapy can improve patients' fitness before surgery.  
38  
39  
40

### 41 **What are the side effects of any treatment received when taking part?**

42 Regular supervised exercise can cause muscle strain but should not cause any  
43 serious problems. If you become concerned you can contact one of us via the  
44 contact details given at the end of this document. In the event of an emergency  
45 please call 999 or go to your local A+E.  
46  
47  
48  
49

### 50 **What are the possible disadvantages and risks of taking part?**

51 You will need to attend the hospital for one extra exercise test (CPX) and an extra  
52 blood test on the morning of your operation that you wouldn't usually have.  
53 Before your routine blood tests we will ask you to fast (not eat any food after  
54 midnight). You may drink water. In addition to your routine standard bloods we will  
55 take 10mls of extra blood, some of which will be frozen and stored for future  
56 research.  
57  
58  
59  
60

8.

**Does prehabilitation improve cardiopulmonary exercise performance in patients undergoing  
neoadjuvant treatment and surgery for oesophagogastric cancer**

(REC 16/LO/1702, R+D 16SURN213028, NCT, IRAS ID 213028)

For peer review only - <http://bmjopen.bmj.com/site/about/guidelines.xhtml> Version 3.1 13/10/2017

(Chemotherapy)

If you are in the intervention arm you will need to attend the Surrey Sports Park regularly for an exercise programme. This is inconvenient but may help reduce complications from surgery and potentially improve your recovery after major surgery. If we find a condition of which you were unaware this will allow us to refer you to the appropriate specialist for further treatment.

CPX - As with all medical tests there is the chance of unwanted side effects or complications. The risk of these with CPX are the same as for moderate exercise. The number of patients that develop problems during the test is low (1 in 1000). The complications that may occur during the test include abnormal blood pressure, fainting, irregular, fast or slow heart rhythms. In exceptionally rare instances there can be serious complications such as a heart attack or stroke. Please see the separate information leaflet 'Your Cardio Pulmonary Exercise test' for more details.

### **What are the possible benefits of taking part?**

We hope that this study will go on to produce further studies which may in time show a definite relationship between prehabilitation and faster recovery after surgery.

For the duration of the study you will be loaned a Fitbit which will track your levels of activity.

A CPX test stresses your heart and lungs in a systematic controlled fashion. If the test shows you are very unfit it will allow us to refer you to the appropriate specialist for further treatment of the medical condition, or it may allow us to offer you alternatives that you are more able to tolerate.

### **What if new information becomes available?**

Sometimes during the course of a research project, new information becomes available about the treatment/drug that is being studied. If this happens, your research doctor will tell you about it and discuss with you whether you want to continue in the study. If you decide to withdraw, your research doctor will make arrangements for your care to continue. If you decide to continue in the study you will be asked to sign an updated consent form.

Also, on receiving new information your research doctor might consider it to be in your best interests to withdraw you from the study. He/she will explain the reasons and arrange for your care to continue.

### **What happens when the research study stops?**

When you are admitted for surgery you will return the Fitbit. After the research stops you will be followed up in the usual manner.

(Chemotherapy)

### What if something goes wrong?

It is unlikely that you will come to any harm during this study. However, if you do come to harm there are no special compensation arrangements.

If you wish to complain or have any concerns about your treatment by members of the team or about the research itself the Patient Advice and Liaison Service (PALS) are available to provide independent help, advice and support. They can be found at the far left corner as you enter the main reception area. They can also be contacted by:

Telephone: 01483 402757

Email: rsc-tr.pals@nhs.net

In person: opening hours 9am-4pm Monday to Friday

### Who has reviewed the study?

This study has been reviewed and received a favourable opinion by London-Bromley Research Ethics Committee.

### Will my taking part in this study be kept confidential?

All information which is collected about you during the course of the research will be kept strictly confidential. Data will be stored in accordance with the data protection act 1998. Data will be stored on a password protected computer or encrypted USB storage device which will be securely retained in a locked office in a separate building which requires swipe card access. Data will only be accessed by members of the direct care team and will be anonymised by assigning a unique study number. Any information about you which leaves the hospital will have your name and address removed so that you cannot be recognised from it. Data will be kept for five years once the trial has finished. Your own GP will be notified of your participation in the trial.

### What will happen to the results of the research study?

The results of the research may be published in a medical journal, but you will not be identified by name in any publications. Once the study has been completed and analysed we can send you a summary of the results if you would like. Please let us know by indicating this on the consent form.

### Who is organising the research?

This study is being organised and coordinated by the Royal Surrey County Hospital Guildford. Your doctors will not be paid for including you in this study.

10.

**Does prehabilitation improve cardiopulmonary exercise performance in patients undergoing neoadjuvant treatment and surgery for oesophagogastric cancer**

(REC 16/LO/1702, R+D 16SURN213028, NCT, IRAS ID 213028)

For peer review only - <http://bmjopen.bmj.com/site/about/guidelines.xhtml> Version 3.1 13/10/2017

(Chemotherapy)

### Will I get travel expenses?

Parking charges and travelling expenses incurred in addition to your routine care can be reimbursed on production of receipts at the cashier's office.

### Contact for Further Information

If you have any questions concerning the study please do not hesitate to contact us:

Miss Sophie Allen, MBBCh, BSc, MRCS  
Research Fellow  
Department of Surgery  
Royal Surrey County Hospital  
Egerton Rd  
Guildford  
GU27XX

Telephone: 01483 571 122 extension 6374

Email: lizzie.elam@nhs.net or amcguire@nhs.net

### Thank you for taking the time to read this information leaflet

**When you attend for your blood tests before your oncology appointment you will be approached by the research team to ask if you wish to take part in the study. You will have the opportunity to raise any concerns or questions and if you decide to take part in the study, you will be asked to sign a written consent form.**

You will be given a copy of the information sheet and a signed consent form to keep

11.

**Does prehabilitation improve cardiopulmonary exercise performance in patients undergoing neoadjuvant treatment and surgery for oesophagogastric cancer**

(REC 16/LO/1702, R+D 16SURN213028, NCT, IRAS ID 213028)

For peer review only - <http://bmjopen.bmj.com/site/about/guidelines.xhtml> Version 3.1 13/10/2017



Study Number: REC 16/LO/1702 R+D 16SURN213028 IRAS ID: 213028

*Patient copy*Patient Identification Number for this trial: 

## CONSENT FORM

**Title of Project: Does prehabilitation improve cardiopulmonary exercise performance and reduce insulin resistance in patients undergoing neoadjuvant treatment and surgery for oesophagogastric cancer?**

Please initial boxes

1. I confirm that I have read and understand the information sheet (Version 3.1 Date 13/10/2017) for the above study and have had the opportunity to consider the information, ask questions and have had these answered satisfactorily.

2. I understand that my participation is voluntary and that I am free to withdraw at any time, without giving any reason, without my medical care or legal rights being affected.

3. I understand that the relevant sections of any of my medical notes and data collected may be looked at by responsible individuals or from regulatory authorities where it is relevant to my taking part in research. I give permission for these individuals to have access to my relevant records.

4. I am aware of the need for psychological support whilst taking part in this study and it has been explained to me how I can obtain this support.

5. I agree to take part in the above study and to my General Practitioner being informed of my participation in the study

6. I agree that my biological materials (blood and tumour samples) collected, and CT scans performed during the study as part of the standard of care, but not related to study procedures etc, may be saved and used for later analysis

7. Once the study has been completed and analysed I would like to be sent you a summary of the results.

---

**Name of Patient**

---

**Signature**

---

**Date**

---

**Name of Person taking consent  
(if different from researcher)**

---

**Signature**

---

**Date**

---

**Researcher**

---

**Signature**

---

**Date**

1.

Study Number: REC16/LO/1702 R+D 16SURN213028 IRAS ID: 213028

Patient Identification Number for this trial:

## CONSENT FORM

**Title of Project: Does prehabilitation improve cardiopulmonary exercise performance and reduce insulin resistance in patients undergoing neoadjuvant treatment and surgery for oesophago-gastric cancer?**

Please initial boxes

1. I confirm that I have read and understand the information sheet (Version 3.1 Date 13/10/2017) for the above study and have had the opportunity to consider the information, ask questions and have had these answered satisfactorily.

|  |
|--|
|  |
|--|

2. I understand that my participation is voluntary and that I am free to withdraw at any time, without giving any reason, without my medical care or legal rights being affected.

|  |
|--|
|  |
|--|

3. I understand that the relevant sections of any of my medical notes and data collected may be looked at by responsible individuals or from regulatory authorities where it is relevant to my taking part in research. I give permission for these individuals to have access to my relevant records.

|  |
|--|
|  |
|--|

4. I am aware of the need for psychological support whilst taking part in this study and it has been explained to me how I can obtain this support.

|  |
|--|
|  |
|--|

5. I agree to take part in the above study and to my General Practitioner being informed of my participation in the study

|  |
|--|
|  |
|--|

6. I agree that my biological materials (blood and tumour samples) collected, and CT scans performed during the study as part of the standard of care, but not related to study procedures etc, may be saved and used for later analysis

|  |
|--|
|  |
|--|

7. Once the study has been completed and analysed I would like to be sent you a summary of the results

|  |
|--|
|  |
|--|

\_\_\_\_\_  
**Name of Patient**

\_\_\_\_\_  
**Signature**

\_\_\_\_\_  
**Date**

\_\_\_\_\_  
 Name of Person taking consent  
 (if different from researcher)

\_\_\_\_\_  
 Signature

\_\_\_\_\_  
 Date

\_\_\_\_\_  
 Researcher

\_\_\_\_\_  
 Signature

\_\_\_\_\_  
 Date

Study Number: REC 16/LO/1702 R+D 16SURN213028 IRAS ID: 213028

Patient Identification Number for this trial:

## CONSENT FORM

**Title of Project: Does prehabilitation improve cardiopulmonary exercise performance and reduce insulin resistance in patients undergoing neoadjuvant treatment and surgery for oesophagogastric cancer?**

Please initial boxes

1. I confirm that I have read and understand the information sheet (Version 3.1 Date 13/10/2017) for the above study and have had the opportunity to consider the information, ask questions and have had these answered satisfactorily.

|  |
|--|
|  |
|--|

2. I understand that my participation is voluntary and that I am free to withdraw at any time, without giving any reason, without my medical care or legal rights being affected.

|  |
|--|
|  |
|--|

3. I understand that the relevant sections of any of my medical notes and data collected may be looked at by responsible individuals or from regulatory authorities where it is relevant to my taking part in research. I give permission for these individuals to have access to my relevant records.

|  |
|--|
|  |
|--|

4. I am aware of the need for psychological support whilst taking part in this study and it has been explained to me how I can obtain this support.

|  |
|--|
|  |
|--|

5. I agree to take part in the above study and to my General Practitioner being informed of my participation in the study

|  |
|--|
|  |
|--|

6. I agree that my biological materials (blood and tumour samples) collected, and CT scans performed during the study as part of the standard of care, but not related to study procedures etc, may be saved and used for later analysis

|  |
|--|
|  |
|--|

7. Once the study has been completed and analysed I would like to be sent you a summary of the results

|  |
|--|
|  |
|--|

\_\_\_\_\_  
Name of Patient

\_\_\_\_\_  
Signature

\_\_\_\_\_  
Date

\_\_\_\_\_  
Name of Person taking consent  
(if different from researcher)

\_\_\_\_\_  
Signature

\_\_\_\_\_  
Date

\_\_\_\_\_  
Researcher

\_\_\_\_\_  
Signature

\_\_\_\_\_  
Date

# Reporting checklist for protocol of a clinical trial.

Based on the SPIRIT guidelines.

## Instructions to authors

Complete this checklist by entering the page numbers from your manuscript where readers will find each of the items listed below.

Your article may not currently address all the items on the checklist. Please modify your text to include the missing information. If you are certain that an item does not apply, please write "n/a" and provide a short explanation.

Upload your completed checklist as an extra file when you submit to a journal.

In your methods section, say that you used the SPIRIT reporting guidelines, and cite them as:

Chan A-W, Tetzlaff JM, Altman DG, Laupacis A, Gøtzsche PC, Krleža-Jerić K, Hróbjartsson A, Mann H, Dickersin K, Berlin J, Doré C, Parulekar W, Summerskill W, Groves T, Schulz K, Sox H, Rockhold FW, Rennie D, Moher D. SPIRIT 2013 Statement: Defining standard protocol items for clinical trials. *Ann Intern Med.* 2013;158(3):200-207

|                                             |                     | Reporting Item                                                                                               | Page Number            |
|---------------------------------------------|---------------------|--------------------------------------------------------------------------------------------------------------|------------------------|
| Title                                       | <a href="#">#1</a>  | Descriptive title identifying the study design, population, interventions, and, if applicable, trial acronym | 1, 2                   |
| Trial registration                          | <a href="#">#2a</a> | Trial identifier and registry name. If not yet registered, name of intended registry                         | 1                      |
| Trial registration: data set                | <a href="#">#2b</a> | All items from the World Health Organization Trial Registration Data Set                                     | 1, 4-13, 16-18, 22, 23 |
| Protocol version                            | <a href="#">#3</a>  | Date and version identifier                                                                                  | 1                      |
| Funding                                     | <a href="#">#4</a>  | Sources and types of financial, material, and other support                                                  | 22, 23                 |
| Roles and responsibilities: contributorship | <a href="#">#5a</a> | Names, affiliations, and roles of protocol contributors                                                      | 1, 2, 23               |

|    |                      |                     |                                                              |            |
|----|----------------------|---------------------|--------------------------------------------------------------|------------|
| 1  | Roles and            | <a href="#">#5b</a> | Name and contact information for the trial sponsor           | 24         |
| 2  | responsibilities:    |                     |                                                              |            |
| 3  | sponsor contact      |                     |                                                              |            |
| 4  | information          |                     |                                                              |            |
| 5  |                      |                     |                                                              |            |
| 6  |                      |                     |                                                              |            |
| 7  |                      |                     |                                                              |            |
| 8  | Roles and            | <a href="#">#5c</a> | Role of study sponsor and funders, if any, in study design;  | 22, 23     |
| 9  | responsibilities:    |                     | collection, management, analysis, and interpretation of      |            |
| 10 | sponsor and funder   |                     | data; writing of the report; and the decision to submit the  |            |
| 11 |                      |                     | report for publication, including whether they will have     |            |
| 12 |                      |                     | ultimate authority over any of these activities              |            |
| 13 |                      |                     |                                                              |            |
| 14 |                      |                     |                                                              |            |
| 15 |                      |                     |                                                              |            |
| 16 |                      |                     |                                                              |            |
| 17 | Roles and            | <a href="#">#5d</a> | Composition, roles, and responsibilities of the coordinating | 22         |
| 18 | responsibilities:    |                     | centre, steering committee, endpoint adjudication            |            |
| 19 | committees           |                     | committee, data management team, and other individuals       |            |
| 20 |                      |                     | or groups overseeing the trial, if applicable (see Item 21a  |            |
| 21 |                      |                     | for data monitoring committee)                               |            |
| 22 |                      |                     |                                                              |            |
| 23 |                      |                     |                                                              |            |
| 24 |                      |                     |                                                              |            |
| 25 | Background and       | <a href="#">#6a</a> | Description of research question and justification for       | 4, 5, 6, 7 |
| 26 | rationale            |                     | undertaking the trial, including summary of relevant         |            |
| 27 |                      |                     | studies (published and unpublished) examining benefits       |            |
| 28 |                      |                     | and harms for each intervention                              |            |
| 29 |                      |                     |                                                              |            |
| 30 |                      |                     |                                                              |            |
| 31 |                      |                     |                                                              |            |
| 32 | Background and       | <a href="#">#6b</a> | Explanation for choice of comparators                        | 4, 5, 6, 7 |
| 33 | rationale: choice of |                     |                                                              |            |
| 34 | comparators          |                     |                                                              |            |
| 35 |                      |                     |                                                              |            |
| 36 |                      |                     |                                                              |            |
| 37 |                      |                     |                                                              |            |
| 38 | Objectives           | <a href="#">#7</a>  | Specific objectives or hypotheses                            | 7, 8       |
| 39 |                      |                     |                                                              |            |
| 40 | Trial design         | <a href="#">#8</a>  | Description of trial design including type of trial (eg,     | 14         |
| 41 |                      |                     | parallel group, crossover, factorial, single group),         |            |
| 42 |                      |                     | allocation ratio, and framework (eg, superiority,            |            |
| 43 |                      |                     | equivalence, non-inferiority, exploratory)                   |            |
| 44 |                      |                     |                                                              |            |
| 45 |                      |                     |                                                              |            |
| 46 |                      |                     |                                                              |            |
| 47 | Study setting        | <a href="#">#9</a>  | Description of study settings (eg, community clinic,         | 14         |
| 48 |                      |                     | academic hospital) and list of countries where data will be  |            |
| 49 |                      |                     | collected. Reference to where list of study sites can be     |            |
| 50 |                      |                     | obtained                                                     |            |
| 51 |                      |                     |                                                              |            |
| 52 |                      |                     |                                                              |            |
| 53 |                      |                     |                                                              |            |
| 54 | Eligibility criteria | <a href="#">#10</a> | Inclusion and exclusion criteria for participants. If        | 8          |
| 55 |                      |                     | applicable, eligibility criteria for study centres and       |            |
| 56 |                      |                     |                                                              |            |
| 57 |                      |                     |                                                              |            |
| 58 |                      |                     |                                                              |            |
| 59 |                      |                     |                                                              |            |
| 60 |                      |                     |                                                              |            |

|    |                      |                                                                                   |            |
|----|----------------------|-----------------------------------------------------------------------------------|------------|
| 1  |                      | individuals who will perform the interventions (eg,                               |            |
| 2  |                      | surgeons, psychotherapists)                                                       |            |
| 3  |                      |                                                                                   |            |
| 4  | Interventions:       | <a href="#">#11a</a> Interventions for each group with sufficient detail to allow | 10, 11,    |
| 5  | description          | replication, including how and when they will be                                  | 12, 13     |
| 6  |                      | administered                                                                      |            |
| 7  |                      |                                                                                   |            |
| 8  |                      |                                                                                   |            |
| 9  | Interventions:       | <a href="#">#11b</a> Criteria for discontinuing or modifying allocated            | 8          |
| 10 | modifications        | interventions for a given trial participant (eg, drug dose                        |            |
| 11 |                      | change in response to harms, participant request, or                              |            |
| 12 |                      | improving / worsening disease)                                                    |            |
| 13 |                      |                                                                                   |            |
| 14 |                      |                                                                                   |            |
| 15 |                      |                                                                                   |            |
| 16 | Interventions:       | <a href="#">#11c</a> Strategies to improve adherence to intervention protocols,   | 11, 12, 13 |
| 17 | adherence            | and any procedures for monitoring adherence (eg, drug                             |            |
| 18 |                      | tablet return; laboratory tests)                                                  |            |
| 19 |                      |                                                                                   |            |
| 20 |                      |                                                                                   |            |
| 21 |                      |                                                                                   |            |
| 22 | Interventions:       | <a href="#">#11d</a> Relevant concomitant care and interventions that are         | n/a        |
| 23 | concomitant care     | permitted or prohibited during the trial                                          |            |
| 24 |                      |                                                                                   |            |
| 25 |                      |                                                                                   |            |
| 26 | Outcomes             | <a href="#">#12</a> Primary, secondary, and other outcomes, including the         | 11, 12, 13 |
| 27 |                      | specific measurement variable (eg, systolic blood                                 |            |
| 28 |                      | pressure), analysis metric (eg, change from baseline, final                       |            |
| 29 |                      | value, time to event), method of aggregation (eg, median,                         |            |
| 30 |                      | proportion), and time point for each outcome. Explanation                         |            |
| 31 |                      | of the clinical relevance of chosen efficacy and harm                             |            |
| 32 |                      | outcomes is strongly recommended                                                  |            |
| 33 |                      |                                                                                   |            |
| 34 |                      |                                                                                   |            |
| 35 |                      |                                                                                   |            |
| 36 |                      |                                                                                   |            |
| 37 |                      |                                                                                   |            |
| 38 | Participant timeline | <a href="#">#13</a> Time schedule of enrolment, interventions (including any      | 13         |
| 39 |                      | run-ins and washouts), assessments, and visits for                                | (Figure 2) |
| 40 |                      | participants. A schematic diagram is highly recommended                           |            |
| 41 |                      | (see Figure)                                                                      |            |
| 42 |                      |                                                                                   |            |
| 43 |                      |                                                                                   |            |
| 44 |                      |                                                                                   |            |
| 45 | Sample size          | <a href="#">#14</a> Estimated number of participants needed to achieve study      | 14, 15     |
| 46 |                      | objectives and how it was determined, including clinical                          |            |
| 47 |                      | and statistical assumptions supporting any sample size                            |            |
| 48 |                      | calculations                                                                      |            |
| 49 |                      |                                                                                   |            |
| 50 |                      |                                                                                   |            |
| 51 |                      |                                                                                   |            |
| 52 | Recruitment          | <a href="#">#15</a> Strategies for achieving adequate participant enrolment to    | 14, 15, 16 |
| 53 |                      | reach target sample size                                                          |            |
| 54 |                      |                                                                                   |            |
| 55 |                      |                                                                                   |            |
| 56 | Allocation: sequence | <a href="#">#16a</a> Method of generating the allocation sequence (eg,            |            |
| 57 | generation           | computer-generated random numbers), and list of any                               |            |
| 58 |                      |                                                                                   |            |
| 59 |                      |                                                                                   |            |
| 60 |                      |                                                                                   |            |

factors for stratification. To reduce predictability of a random sequence, details of any planned restriction (eg, blocking) should be provided in a separate document that is unavailable to those who enrol participants or assign interventions

|    |                       |                      |                                                                   |
|----|-----------------------|----------------------|-------------------------------------------------------------------|
| 1  |                       |                      |                                                                   |
| 2  |                       |                      |                                                                   |
| 3  |                       |                      |                                                                   |
| 4  |                       |                      |                                                                   |
| 5  |                       |                      |                                                                   |
| 6  |                       |                      |                                                                   |
| 7  |                       |                      |                                                                   |
| 8  |                       |                      |                                                                   |
| 9  | Allocation            | <a href="#">#16b</a> | Mechanism of implementing the allocation sequence (eg, 14         |
| 10 | concealment           |                      | central telephone; sequentially numbered, opaque, sealed          |
| 11 | mechanism             |                      | envelopes), describing any steps to conceal the sequence          |
| 12 |                       |                      | until interventions are assigned                                  |
| 13 |                       |                      |                                                                   |
| 14 |                       |                      |                                                                   |
| 15 |                       |                      |                                                                   |
| 16 | Allocation:           | <a href="#">#16c</a> | Who will generate the allocation sequence, who will enrol 14      |
| 17 | implementation        |                      | participants, and who will assign participants to                 |
| 18 |                       |                      | interventions                                                     |
| 19 |                       |                      |                                                                   |
| 20 |                       |                      |                                                                   |
| 21 | Blinding (masking)    | <a href="#">#17a</a> | Who will be blinded after assignment to interventions (eg, 14     |
| 22 |                       |                      | trial participants, care providers, outcome assessors, data       |
| 23 |                       |                      | analysts), and how                                                |
| 24 |                       |                      |                                                                   |
| 25 |                       |                      |                                                                   |
| 26 |                       |                      |                                                                   |
| 27 | Blinding (masking):   | <a href="#">#17b</a> | If blinded, circumstances under which unblinding is n/a           |
| 28 | emergency             |                      | permissible, and procedure for revealing a participant's          |
| 29 | unblinding            |                      | allocated intervention during the trial                           |
| 30 |                       |                      |                                                                   |
| 31 |                       |                      |                                                                   |
| 32 | Data collection plan  | <a href="#">#18a</a> | Plans for assessment and collection of outcome, baseline, 10, 11, |
| 33 |                       |                      | and other trial data, including any related processes to 12, 13   |
| 34 |                       |                      | promote data quality (eg, duplicate measurements,                 |
| 35 |                       |                      | training of assessors) and a description of study                 |
| 36 |                       |                      | instruments (eg, questionnaires, laboratory tests) along          |
| 37 |                       |                      | with their reliability and validity, if known. Reference to       |
| 38 |                       |                      | where data collection forms can be found, if not in the           |
| 39 |                       |                      | protocol                                                          |
| 40 |                       |                      |                                                                   |
| 41 |                       |                      |                                                                   |
| 42 |                       |                      |                                                                   |
| 43 |                       |                      |                                                                   |
| 44 |                       |                      |                                                                   |
| 45 |                       |                      |                                                                   |
| 46 | Data collection plan: | <a href="#">#18b</a> | Plans to promote participant retention and complete 10,11         |
| 47 | retention             |                      | follow-up, including list of any outcome data to be               |
| 48 |                       |                      | collected for participants who discontinue or deviate from        |
| 49 |                       |                      | intervention protocols                                            |
| 50 |                       |                      |                                                                   |
| 51 |                       |                      |                                                                   |
| 52 |                       |                      |                                                                   |
| 53 | Data management       | <a href="#">#19</a>  | Plans for data entry, coding, security, and storage, 18           |
| 54 |                       |                      | including any related processes to promote data quality           |
| 55 |                       |                      | (eg, double data entry; range checks for data values).            |
| 56 |                       |                      |                                                                   |
| 57 |                       |                      |                                                                   |
| 58 |                       |                      |                                                                   |
| 59 |                       |                      |                                                                   |
| 60 |                       |                      |                                                                   |

|    |                        |                                                                                  |       |
|----|------------------------|----------------------------------------------------------------------------------|-------|
| 1  |                        | Reference to where details of data management                                    |       |
| 2  |                        | procedures can be found, if not in the protocol                                  |       |
| 3  |                        |                                                                                  |       |
| 4  | Statistics: outcomes   | <a href="#">#20a</a> Statistical methods for analysing primary and secondary     | 15    |
| 5  |                        | outcomes. Reference to where other details of the                                |       |
| 6  |                        | statistical analysis plan can be found, if not in the protocol                   |       |
| 7  |                        |                                                                                  |       |
| 8  |                        |                                                                                  |       |
| 9  | Statistics: additional | <a href="#">#20b</a> Methods for any additional analyses (eg, subgroup and       | 15    |
| 10 | analyses               | adjusted analyses)                                                               |       |
| 11 |                        |                                                                                  |       |
| 12 |                        |                                                                                  |       |
| 13 | Statistics: analysis   | <a href="#">#20c</a> Definition of analysis population relating to protocol non- | 15    |
| 14 | population and         | adherence (eg, as randomised analysis), and any                                  |       |
| 15 | missing data           | statistical methods to handle missing data (eg, multiple                         |       |
| 16 |                        | imputation)                                                                      |       |
| 17 |                        |                                                                                  |       |
| 18 |                        |                                                                                  |       |
| 19 |                        |                                                                                  |       |
| 20 | Data monitoring:       | <a href="#">#21a</a> Composition of data monitoring committee (DMC);             | 18    |
| 21 | formal committee       | summary of its role and reporting structure; statement of                        |       |
| 22 |                        | whether it is independent from the sponsor and competing                         |       |
| 23 |                        | interests; and reference to where further details about its                      |       |
| 24 |                        | charter can be found, if not in the protocol. Alternatively,                     |       |
| 25 |                        | an explanation of why a DMC is not needed                                        |       |
| 26 |                        |                                                                                  |       |
| 27 |                        |                                                                                  |       |
| 28 |                        |                                                                                  |       |
| 29 |                        |                                                                                  |       |
| 30 |                        |                                                                                  |       |
| 31 | Data monitoring:       | <a href="#">#21b</a> Description of any interim analyses and stopping            | 8, 17 |
| 32 | interim analysis       | guidelines, including who will have access to these interim                      |       |
| 33 |                        | results and make the final decision to terminate the trial                       |       |
| 34 |                        |                                                                                  |       |
| 35 |                        |                                                                                  |       |
| 36 | Harms                  | <a href="#">#22</a> Plans for collecting, assessing, reporting, and managing     | 8     |
| 37 |                        | solicited and spontaneously reported adverse events and                          |       |
| 38 |                        | other unintended effects of trial interventions or trial                         |       |
| 39 |                        | conduct                                                                          |       |
| 40 |                        |                                                                                  |       |
| 41 |                        |                                                                                  |       |
| 42 |                        |                                                                                  |       |
| 43 | Auditing               | <a href="#">#23</a> Frequency and procedures for auditing trial conduct, if      | 18    |
| 44 |                        | any, and whether the process will be independent from                            |       |
| 45 |                        | investigators and the sponsor                                                    |       |
| 46 |                        |                                                                                  |       |
| 47 |                        |                                                                                  |       |
| 48 |                        |                                                                                  |       |
| 49 | Research ethics        | <a href="#">#24</a> Plans for seeking research ethics committee / institutional  | 17    |
| 50 | approval               | review board (REC / IRB) approval                                                |       |
| 51 |                        |                                                                                  |       |
| 52 |                        |                                                                                  |       |
| 53 | Protocol               | <a href="#">#25</a> Plans for communicating important protocol modifications     | 17    |
| 54 | amendments             | (eg, changes to eligibility criteria, outcomes, analyses) to                     |       |
| 55 |                        | relevant parties (eg, investigators, REC / IRBs, trial                           |       |
| 56 |                        | participants, trial registries, journals, regulators)                            |       |
| 57 |                        |                                                                                  |       |
| 58 |                        |                                                                                  |       |
| 59 |                        |                                                                                  |       |
| 60 |                        |                                                                                  |       |



|    |                       |                      |                                                                 |        |
|----|-----------------------|----------------------|-----------------------------------------------------------------|--------|
| 1  | Consent or assent     | <a href="#">#26a</a> | Who will obtain informed consent or assent from potential       | 17     |
| 2  |                       |                      | trial participants or authorised surrogates, and how (see       |        |
| 3  |                       |                      | Item 32)                                                        |        |
| 4  |                       |                      |                                                                 |        |
| 5  |                       |                      |                                                                 |        |
| 6  | Consent or assent:    | <a href="#">#26b</a> | Additional consent provisions for collection and use of         | n/a    |
| 7  | ancillary studies     |                      | participant data and biological specimens in ancillary          |        |
| 8  |                       |                      | studies, if applicable                                          |        |
| 9  |                       |                      |                                                                 |        |
| 10 |                       |                      |                                                                 |        |
| 11 |                       |                      |                                                                 |        |
| 12 | Confidentiality       | <a href="#">#27</a>  | How personal information about potential and enrolled           | 18     |
| 13 |                       |                      | participants will be collected, shared, and maintained in       |        |
| 14 |                       |                      | order to protect confidentiality before, during, and after the  |        |
| 15 |                       |                      | trial                                                           |        |
| 16 |                       |                      |                                                                 |        |
| 17 |                       |                      |                                                                 |        |
| 18 |                       |                      |                                                                 |        |
| 19 | Declaration of        | <a href="#">#28</a>  | Financial and other competing interests for principal           | 22, 23 |
| 20 | interests             |                      | investigators for the overall trial and each study site         |        |
| 21 |                       |                      |                                                                 |        |
| 22 |                       |                      |                                                                 |        |
| 23 | Data access           | <a href="#">#29</a>  | Statement of who will have access to the final trial dataset,   | 18     |
| 24 |                       |                      | and disclosure of contractual agreements that limit such        |        |
| 25 |                       |                      | access for investigators                                        |        |
| 26 |                       |                      |                                                                 |        |
| 27 |                       |                      |                                                                 |        |
| 28 |                       |                      |                                                                 |        |
| 29 | Ancillary and post    | <a href="#">#30</a>  | Provisions, if any, for ancillary and post-trial care, and for  | n/a    |
| 30 | trial care            |                      | compensation to those who suffer harm from trial                |        |
| 31 |                       |                      | participation                                                   |        |
| 32 |                       |                      |                                                                 |        |
| 33 |                       |                      |                                                                 |        |
| 34 | Dissemination         | <a href="#">#31a</a> | Plans for investigators and sponsor to communicate trial        | 18     |
| 35 | policy: trial results |                      | results to participants, healthcare professionals, the          |        |
| 36 |                       |                      | public, and other relevant groups (eg, via publication,         |        |
| 37 |                       |                      | reporting in results databases, or other data sharing           |        |
| 38 |                       |                      | arrangements), including any publication restrictions           |        |
| 39 |                       |                      |                                                                 |        |
| 40 |                       |                      |                                                                 |        |
| 41 |                       |                      |                                                                 |        |
| 42 |                       |                      |                                                                 |        |
| 43 | Dissemination         | <a href="#">#31b</a> | Authorship eligibility guidelines and any intended use of       | 22     |
| 44 | policy: authorship    |                      | professional writers                                            |        |
| 45 |                       |                      |                                                                 |        |
| 46 |                       |                      |                                                                 |        |
| 47 | Dissemination         | <a href="#">#31c</a> | Plans, if any, for granting public access to the full protocol, | n/a    |
| 48 | policy: reproducible  |                      | participant-level dataset, and statistical code                 |        |
| 49 | research              |                      |                                                                 |        |
| 50 |                       |                      |                                                                 |        |
| 51 |                       |                      |                                                                 |        |
| 52 | Informed consent      | <a href="#">#32</a>  | Model consent form and other related documentation              | 24     |
| 53 | materials             |                      | given to participants and authorised surrogates                 |        |
| 54 |                       |                      |                                                                 |        |
| 55 |                       |                      |                                                                 |        |
| 56 | Biological specimens  | <a href="#">#33</a>  | Plans for collection, laboratory evaluation, and storage of     | n/a    |
| 57 |                       |                      | biological specimens for genetic or molecular analysis in       |        |
| 58 |                       |                      |                                                                 |        |
| 59 |                       |                      |                                                                 |        |
| 60 |                       |                      |                                                                 |        |

1 the current trial and for future use in ancillary studies, if  
2 applicable  
3

4 The SPIRIT checklist is distributed under the terms of the Creative Commons Attribution License CC-  
5 BY-ND 3.0. This checklist can be completed online using <https://www.goodreports.org/>, a tool made  
6 by the [EQUATOR Network](#) in collaboration with [Penelope.ai](#)  
7  
8  
9  
10  
11  
12  
13  
14  
15  
16  
17  
18  
19  
20  
21  
22  
23  
24  
25  
26  
27  
28  
29  
30  
31  
32  
33  
34  
35  
36  
37  
38  
39  
40  
41  
42  
43  
44  
45  
46  
47  
48  
49  
50  
51  
52  
53  
54  
55  
56  
57  
58  
59  
60

# BMJ Open

## A randomised controlled trial to assess whether prehabilitation improves fitness in patients undergoing neoadjuvant treatment prior to oesophago-gastric cancer surgery: Protocol

|                                 |                                                                                                                                                                                                                                                                                                                                                                                                                                                                                                                                                                                                                                                                  |
|---------------------------------|------------------------------------------------------------------------------------------------------------------------------------------------------------------------------------------------------------------------------------------------------------------------------------------------------------------------------------------------------------------------------------------------------------------------------------------------------------------------------------------------------------------------------------------------------------------------------------------------------------------------------------------------------------------|
| Journal:                        | <i>BMJ Open</i>                                                                                                                                                                                                                                                                                                                                                                                                                                                                                                                                                                                                                                                  |
| Manuscript ID                   | bmjopen-2018-023190.R1                                                                                                                                                                                                                                                                                                                                                                                                                                                                                                                                                                                                                                           |
| Article Type:                   | Protocol                                                                                                                                                                                                                                                                                                                                                                                                                                                                                                                                                                                                                                                         |
| Date Submitted by the Author:   | 25-Jul-2018                                                                                                                                                                                                                                                                                                                                                                                                                                                                                                                                                                                                                                                      |
| Complete List of Authors:       | Allen, Sophie; The Royal Surrey County Hospital, Oesophago-gastric Surgery<br>Brown, Vanessa; The Royal Surrey County Hospital, Oesophago-gastric Surgery<br>Prabhu, Pradeep; The Royal Surrey County Hospital, Oesophago-gastric Surgery<br>Scott, Michael; University of Surrey, Anaesthesia & Intensive Care Medicine; Royal Surrey County Hospital NHS Foundation Trust, Anaesthesia & Intensive Care Medicine<br>Rockall, Timothy; The Royal Surrey County Hospital, Oesophago-gastric Surgery<br>Preston, Shaun; The Royal Surrey County Hospital, Oesophago-gastric Surgery<br>Sultan, Javed; The Royal Surrey County Hospital, Oesophago-gastric Surgery |
| <b>Primary Subject Heading</b>: | Surgery                                                                                                                                                                                                                                                                                                                                                                                                                                                                                                                                                                                                                                                          |
| Secondary Subject Heading:      | Sports and exercise medicine                                                                                                                                                                                                                                                                                                                                                                                                                                                                                                                                                                                                                                     |
| Keywords:                       | Prehabilitation, Oesophageal, Cancer, Neoadjuvant, Cardiopulmonary Exercise Test                                                                                                                                                                                                                                                                                                                                                                                                                                                                                                                                                                                 |
|                                 |                                                                                                                                                                                                                                                                                                                                                                                                                                                                                                                                                                                                                                                                  |

SCHOLARONE™  
Manuscripts

1  
2  
3 **A randomised controlled trial to assess whether prehabilitation improves**  
4 **fitness in patients undergoing neoadjuvant treatment prior to oesophago-**  
5 **gastric cancer surgery: Protocol**  
6  
7  
8

9 Trial registration number: NCT02950324 1/11/16

10  
11 V2.1 10/07/2018  
12  
13

14  
15  
16 Sophie Allen, Vanessa Brown, Pradeep Prabhu, Michael Scott, Timothy Rockall,  
17  
18 Shaun Preston, Javed Sultan  
19  
20  
21

22 Corresponding author:  
23

24 Javed Sultan,  
25

26 Department of Oesophagogastric Surgery,  
27

28 The Royal Surrey County Hospital,  
29

30 Egerton Road,  
31

32 Guildford,  
33

34 UK,  
35

36 GU2 7XX  
37  
38  
39  
40  
41

42 Email: [javed.sultan@nhs.net](mailto:javed.sultan@nhs.net)  
43

44 Telephone: 01483 571122  
45

46 Fax: 01483 406636  
47  
48  
49

50 Sophie Allen, The Royal Surrey County Hospital NHS Foundation Trust, Guildford, UK  
51

52 Vanessa Brown, The Royal Surrey County Hospital NHS Foundation Trust, Guildford,  
53

54 UK  
55  
56  
57  
58  
59  
60

1  
2  
3 Pradeep Prabhu, The Royal Surrey County Hospital NHS Foundation Trust, Guildford,  
4  
5 UK

6  
7 Michael Scott, The Royal Surrey County Hospital NHS Foundation Trust, Guildford,  
8  
9 UK

10  
11 Timothy Rockall, The Royal Surrey County Hospital NHS Foundation Trust, Guildford,  
12  
13 UK

14  
15 Shaun Preston, The Royal Surrey County Hospital NHS Foundation Trust, Guildford,  
16  
17 UK

18  
19 Javed Sultan, The Royal Surrey County Hospital NHS Foundation Trust, Guildford, UK  
20  
21 – *corresponding author*  
22  
23

24  
25  
26 **Keywords and phrases:** Prehabilitation; Oesophageal; Cancer; Neoadjuvant;  
27  
28 Cardiopulmonary Exercise Test  
29  
30

31  
32  
33 **Word count 4142**  
34  
35

### 36 37 38 39 **Abstract** 40

#### 41 42 43 **Introduction** 44

45  
46 Neoadjuvant therapy prior to oesophago-gastric resection is the gold standard of care  
47  
48 for patients with T2 and/or nodal disease. Despite this, studies have taught us that  
49  
50 chemotherapy decreases patients' functional capacity as assessed by  
51  
52 cardiopulmonary exercise (CPX) testing. We aim to show that a multimodal  
53  
54 prehabilitation programme comprising of supervised exercise, psychological coaching  
55  
56  
57  
58  
59  
60

1  
2  
3 and nutritional support, will physically, psychologically and metabolically optimise  
4 these patients prior to oesophago-gastric cancer surgery so they may better withstand  
5 the immense physical and metabolic stress placed upon them by radical curative  
6 major surgery.  
7  
8  
9  
10

## 11 12 13 **Methods and Analysis**

14  
15 This will be a prospective, randomised, controlled, parallel, single-centre superiority  
16 trial comparing a multimodal 'prehabilitation' intervention with 'standard care' in  
17 patients with oesophago-gastric malignancy who are treated with neoadjuvant therapy  
18 prior to surgical resection. The primary aim is to demonstrate an improvement in  
19 baseline cardiopulmonary function as assessed by anaerobic threshold during CPX  
20 testing in an interventional (Prehab) group following a 15-week preoperative exercise  
21 programme, throughout and following neoadjuvant treatment, when compared with  
22 those that undergo standard care (Control group). Secondary objectives include  
23 changes in Peak VO<sub>2</sub> and Work Rate (total watts achieved) at CPX testing, insulin  
24 resistance, quality of life, chemotherapy related toxicity and completions, nutritional  
25 assessment, postoperative complication rate, length of stay, and overall mortality.  
26  
27  
28  
29  
30  
31  
32  
33  
34  
35  
36  
37  
38  
39  
40  
41

## 42 **Ethics and dissemination**

43  
44 This study has been approved by the London-Bromley Research Ethics Committee  
45 and registered on ClinicalTrials.gov. The results will be disseminated in a peer-  
46 reviewed journal. Trial registration number: NCT02950324.  
47  
48  
49  
50  
51

## 52 **'Article summary' Strengths of limitations**

**Strengths:**

- To our knowledge, no studies assessing the feasibility of a supervised exercise programme during chemotherapy before surgery for oesophago-gastric cancer have been published.
- This is a prospective, parallel, randomised-controlled trial with patients randomised in a 1:1 manner and subjects analysed on an intention-to-treat basis.
- The exercise component of the prehabilitation programme is supervised by a Clinical Exercise Scientist who will construct a rigorous, tailored, individual, exercise programme for each patient based on their baseline functional capacity as assessed by cardiopulmonary exercise testing.
- CPX is established, noninvasive and safe and may be considered the 'gold standard' method of assessing patients' cardiopulmonary reserve prior to surgery. CPX outcome measures will be objectively measured by an experienced consultant anaesthetist, external to the trial study group.

**Limitations:**

- The unblinded, single-centre trial has a relatively small sample size is powered for AT and not clinical outcomes.

**Introduction**

As a result of the MAGIC [1] and OEO2 [2] trials, neoadjuvant therapy followed by surgery gives the best chance of cure for patients diagnosed with locally advanced oesophago-gastric cancer. It aims to increase the chance of curative resection by

1  
2  
3 eliminating micrometastases, downsizing the tumour and increasing the R0 resection  
4 rate [1, 3, 4]. The ongoing open label, phase III Neo-AEGIS trial [5], compares pre and  
5 postoperative chemotherapy and neoadjuvant chemoradiotherapy as per the MAGIC  
6 and CROSS [6] protocols respectively.  
7  
8  
9  
10

11  
12  
13 Adequate cardiopulmonary function is of great importance to patients undergoing  
14 oesophago-gastric cancer surgery (OGCS) such as Ivor Lewis oesophagectomy, as  
15 this major two stage, two field elective operation is associated with a large metabolic  
16 stress response and significant morbidity [7]. Reported side effects of chemotherapy  
17 are a reduction in functional capacity, which can be objectively measured using  
18 cardiopulmonary exercise testing (CPX). CPX is an established, noninvasive and safe  
19 method of assessing patients' cardiopulmonary reserve prior to surgery. Both  
20 anaerobic threshold (AT) and peak oxygen uptake (Peak  $\text{VO}_2$ ) have consistently been  
21 associated with morbidity and functional outcomes in patients undergoing major  
22 elective surgery [8-11], with a reported average decrease in AT of 2 ml/kg/min in  
23 patients undergoing neoadjuvant chemotherapy (NAC) prior to oesophagectomy.  
24 Furthermore, this decrease in fitness has been associated with diminished one year  
25 survival in these patients [12].  
26  
27  
28  
29  
30  
31  
32  
33  
34  
35  
36  
37  
38  
39  
40  
41  
42  
43

44 The emerging concept of 'prehabilitation' is the process of enhancing an individual's  
45 functional capacity to enable them to withstand a stressful event such as major  
46 elective surgery. A key component of prehabilitation, physical exercise training, has  
47 led to improvements in AT [13, 14]. When initiated in the neoadjuvant setting,  
48 prehabilitation may have important implications as exercise training can stimulate  
49 skeletal muscle adaptations such as increased mitochondrial content and improve  
50  
51  
52  
53  
54  
55  
56  
57  
58  
59  
60



1  
2  
3 oxygen uptake capacity [15]. Both West et al. [16] and Heldens et al. [17] have  
4  
5 demonstrated that an exercise programme during neoadjuvant therapy for cancer is  
6  
7 feasible, with minimal patient drop-out.  
8  
9

10  
11 Another key component of prehabilitation is a psychological intervention, 'Medical  
12  
13 Coaching'. Anxiety and depression are commonplace in patients receiving cancer  
14  
15 treatment and depression and may be associated with reduced treatment compliance  
16  
17 [18]. Psychological support aims to reduce anxiety and depression prior to surgery [19,  
18  
19 20]. It has been suggested that improvement in exercise capacity during the  
20  
21 preoperative period may be a result of the belief of patients that fitness levels aid recovery  
22  
23 [21]. Using Bandura's Social Cognitive Theory, it is proposed that psychological  
24  
25 coaching can lead to an increase in self-belief to carry out a particular task and that it  
26  
27 will empower patients to proactively take control of their behaviour preoperatively,  
28  
29 leading to improved engagement with the exercise aspect of the intervention [22].  
30  
31  
32  
33  
34

35  
36 In addition to cardiopulmonary function and anxiety, the physiological stress of surgery  
37  
38 is associated with various metabolic derangements, central to which is the  
39  
40 development of insulin resistance (IR). The degree of insulin resistance appears to be  
41  
42 related to the magnitude of the 'surgical stress'. IR may be one of the key mechanisms  
43  
44 triggering major inflammatory complications following surgery [23, 24].  
45  
46  
47

48  
49 Sarcopenia, the involuntary loss of muscle mass, is readily induced as a result of  
50  
51 chemotherapy. Oesophago-gastric cancer patients with signs of sarcopenia have been  
52  
53 shown to have high rates of treatment drop-out, higher postoperative complication  
54  
55 rates, and reduced overall survival [25, 26].  
56  
57  
58  
59  
60

1  
2  
3  
4  
5 To our knowledge there are no published studies assessing the feasibility of a  
6 supervised exercise programme during chemotherapy before surgery for oesophago-  
7 gastric cancer. The primary aim is to demonstrate an improvement in baseline  
8 cardiopulmonary function as assessed by anaerobic threshold during CPX testing in  
9 an interventional (Prehab) group following a 15 week preoperative exercise  
10 programme, throughout and following neoadjuvant treatment, when compared with  
11 those that undergo standard care (Control group).  
12  
13  
14  
15  
16  
17  
18  
19  
20  
21

## 22 **Methods and Analysis**

### 23 24 25 26 **Study setting**

27  
28 This study is a prospective, randomised, controlled, parallel, open single-centre  
29 superiority trial which will compare 'prehabilitation' with 'standard care' in patients with  
30 oesophago-gastric cancer who are treated with neoadjuvant chemotherapy or  
31 chemoradiotherapy (as part of the Neo-AEGIS trial) prior to surgical resection. The trial  
32 and treatment will be conducted at the Royal Surrey County Hospital (UK), a tertiary  
33 referral centre for oesophago-gastric malignancy.  
34  
35  
36  
37  
38  
39  
40  
41  
42  
43

44 The research team attended the Oesophageal Patient Association Support Group  
45 where they were able to learn and understand about patient's previous experiences of  
46 cancer treatment. Patients' experiences and views were taken into account when  
47 writing the study protocol to include the content of the prehab programme and mode of  
48 intervention delivery. The team were able to engage and empower the patient to  
49 contribute to the construction of a patient-centered trial.  
50  
51  
52  
53  
54  
55  
56  
57  
58  
59  
60

## Study objectives

In the intervention (Prehab) group, the primary objective is to demonstrate an improvement in baseline AT following a 15-week preoperative exercise programme which will take place throughout NAC and during the 6-week period of recovery prior to surgical resection. AT will be compared with those that undergo standard care (the control group).

Secondary objectives will include assessment of the protocol feasibility (as determined by subject drop-out, and both attendance, and adherence, to Prehab exercise sessions). Alternative measures of functional reserve will be evaluated, in particular change in Peak  $\text{VO}_2$  and Work Rate (total watts achieved) during CPX testing. The effect of a Prehab programme on insulin resistance will be assessed by the HOMA2 calculation. Further secondary objectives include the effect of the Prehab programme on chemotherapy related toxicities, tolerance and completion rates, the impact of preoperative psychological coaching on validated quality of life scores (EORTC QLQ-C30, EORTC QLQ –OG25, Beck Anxiety Inventory (BAI)), and Beck Depression Inventory (BDI II)), and the effect of prehabilitation on nutritional status as assessed using hand grip strength and sarcopenia. Postoperative complications will be assessed using the Clavien-Dindo classification and as agreed per the Esophagectomy Complications Consensus Group [27]. Length of intensive care and hospital stay, 30 day, 90 day, 1 year and 5 year mortality will also be analysed.

## Inclusion and exclusion criteria

1  
2  
3 Patients with T2 and / or N1 resectable oesophago-gastric carcinoma being  
4 considered for neoadjuvant therapy prior to oesophago-gastrectomy or extended total  
5 gastrectomy will be included. Patients will be excluded if they fulfill one or more of the  
6 following criteria: <18 years of age, a known contraindication to CPX testing (e.g.  
7 unstable cardiac disease), a physical inability to perform CPX testing or undertake a  
8 prehabilitation exercise programme (e.g. lower limb dysfunction), pregnancy (or those  
9 planning to become pregnant), or a lack of capacity to give informed consent.  
10  
11  
12  
13  
14  
15  
16  
17  
18  
19

20 Guidelines to cessation of participation in the study will include withdrawal of patient  
21 consent, serious adverse event, and non-compliance. Decision for patient-withdrawal  
22 will be made by the Chief Investigator in conjunction with the trial Sponsor. In the case  
23 of withdrawal, the patient will continue standard treatment within the dedicated  
24 oesophago-gastric and oncological departments.  
25  
26  
27  
28  
29  
30  
31  
32

### 33 **Interventions**

34  
35 Following a dedicated oesophago-gastric staging pathway, including Anaesthetic and  
36 Cancer Multi-disciplinary Team (MDT) discussions, all patients whose proposed  
37 treatment includes neoadjuvant therapy and surgery will undergo a baseline CPX test  
38 as part of standard care. Here, eligibility will be assessed. At the next consultation  
39 (surgical or oncological outpatient clinic appointment), eligible patients will be  
40 approached by the chief investigator (CI) or clinical supervisor (CS) in order to confirm  
41 inclusion and exclusion criteria. Patients will at this stage be invited to participate in the  
42 study (Appendix 1. Patient information leaflet). If interested, one of the above research  
43 team members will explain the study to the patient and give them a copy of the patient  
44 information sheet to review. The patient will be given the opportunity to ask any  
45  
46  
47  
48  
49  
50  
51  
52  
53  
54  
55  
56  
57  
58  
59  
60

1  
2  
3 questions they may have about the study and will be given at least 24 hours to  
4  
5 consider participation. The research team will emphasise that non-participation will not  
6  
7 adversely affect any aspects of their care. The patient will attend for pre-chemotherapy  
8  
9 blood tests as part of their standard care pathway. At this time, the patient will be  
10  
11 invited to give written consent to the trial. Patients will be informed that they are free to  
12  
13 withdraw at any time without giving a reason and again that this will not adversely  
14  
15 affect any aspects of their care. If the patient is willing to provide informed consent  
16  
17 they will be asked to sign the patient consent form. Consent will be obtained by a  
18  
19 suitably qualified person in accordance with international Good Clinical Practice (GCP)  
20  
21 guidelines. The patient will be randomised to the intervention (Prehab) or Control  
22  
23 group by the consenting clinician (see 'Methodology and Study Design' below).  
24  
25  
26  
27

## 28 **Study group**

### 29 **1) Prehab group**

30  
31  
32  
33  
34  
35 **Exercise intervention:** Over a 15 week period, patients will attend the Human  
36  
37 Performance Institute at Surrey Sports Park for twice weekly one hour exercise  
38  
39 sessions (30 sessions in total) supervised directly by a Clinical Exercise Scientist with  
40  
41 expertise in Cancer Care.  
42  
43  
44  
45

46 The exercise program will consist of cardiorespiratory, resistance and flexibility training  
47  
48 in accordance with the American College of Sports Medicine guidelines [28].  
49  
50

51  
52 At the first supervised exercise session, patients will be counselled by the trainer and  
53  
54 issued with FitBit Flex2® physical activity monitor. The trainer will construct a tailored  
55  
56  
57  
58  
59

1  
2  
3 programme for each patients based on their baseline (pre-chemotherapy)  
4  
5 cardiopulmonary exercise test performance and calculated heart rate reserve.  
6  
7

8  
9 During the aerobic training component, the intensity of cardiorespiratory exercise will  
10  
11 be monitored every 5 minutes using the BORG rating of perceived exertion scale  
12  
13 (RPE) (Borg, 1998), with power output on the cycle ergometer (Ergoline, Lovemedical,  
14  
15 UK) controlled within the ranges of 11 (*Fairly light*) and 14 (*Somewhat hard/Hard*)  
16  
17 on the BORG scale. Heart rate will be recorded every 5 minutes using a Polar HR  
18  
19 monitor (Polar FT1, Polar, UK). The trainer will aim for the patient to complete 20  
20  
21 minutes of cycling at an incremental increase from 40% heart rate reserve (HRR) to  
22  
23 60% HRR over the duration of the course.  
24  
25  
26  
27

28  
29 The resistance exercises performed will provide stimulus to each of the major muscle  
30  
31 groups. Resistance training will be of a sufficient intensity tailored to each individual  
32  
33 patient to enhance strength, muscular endurance and maintain fat-free mass with a  
34  
35 progressive approach to exercise training over the 15 weeks. Two sets of 12  
36  
37 repetitions of each exercise will be performed. Flexibility exercises will be incorporated  
38  
39 into the overall fitness program sufficient to develop and maintain range of motion  
40  
41 including appropriate static and/or dynamic stretches. Resistance exercises will be  
42  
43 scored on a rating of perceived exertion scale, when the score drops below 12 for a  
44  
45 given exercise, the intensity of resistance will be increased.  
46  
47  
48  
49

50  
51 Patients will also undergo a Home Exercise Plan (HEP) for one hour, three times a  
52  
53 week. The HEP will focus on resistance and core stability exercises and will be  
54  
55 monitored via a patient-maintained diary.  
56  
57  
58  
59

1  
2  
3  
4  
5 Throughout the duration of the prehabilitation programme, all patients will be asked to  
6  
7 wear a Fitbit Flex2® physical activity monitor on their non-dominant wrist as an  
8  
9 objective measure of background activity. The Clinical Exercise Scientist will record  
10  
11 weekly steps at their supervised exercise sessions. They will also monitor session  
12  
13 compliance.  
14  
15

16  
17  
18 **Psychological (Medical Coaching) intervention:** In conjunction with The Fountain  
19  
20 Centre (St Luke's Cancer Centre, Guildford, UK), patients will undergo 6 medical  
21  
22 coaching sessions during their neoadjuvant treatment. The team consists of  
23  
24 professional medical coaches with over 200 hours experience in coaching individuals  
25  
26 with medical conditions. They are accredited with the international and UK coaching  
27  
28 bodies, International Coaching Federation (ICF) and National Council of  
29  
30 Psychotherapists (NCP). Sessions will take the following form: Discussion of medical  
31  
32 and health status; strengths recognition; resilience profiling and development; social  
33  
34 and support systems; emotional management; and goal setting. The Medical Coach  
35  
36 will provide suggestions on how to enhance and reinforce patients' motivation to  
37  
38 comply with the exercise aspect of the intervention.  
39  
40  
41  
42  
43

44 **Nutritional support:** Nutrition is of great importance to this cohort of patients as they  
45  
46 are often malnourished and cachexic at presentation. The Trust employs 2.4  
47  
48 equivalent specialist dieticians per 60 cancer resections who are highly trained in the  
49  
50 field of oesophagogastric surgery and have extensive experience in the management  
51  
52 of complex nutritional problems related to the disease. All patients will receive  
53  
54  
55  
56  
57  
58  
59  
60

1  
2  
3 frequent, tailored dietetic input, with calorie and protein intake increase where  
4  
5 appropriate.  
6  
7

8  
9 In order to minimize the number of appointments required to attend by the Prehab  
10 group, where possible supervised exercise sessions will be scheduled for the day of a  
11 pre-existing oncology or surgical appointment. Following a face-to-face meeting with  
12 the Medical Coach, meetings will take place according to the patient's preference,  
13 either in person (following on from their supervised exercise session), or via  
14 teleconference (eg Skype).  
15  
16  
17  
18  
19  
20  
21  
22  
23

## 24 **2) Control group**

25  
26 The control group will not receive a prehabilitation intervention but will be treated  
27 according to the standard OG care pathway. As part of usual care, all patients will be  
28 fully informed to improve fitness levels and to maintain a healthy lifestyle prior to  
29 surgery in order to obtain the best outcomes from high risk surgery. Patients will  
30 continue to be offered standard dietetic and CNS led psychological support as per the  
31 hospital's current cancer pathway and standard of care. Patients will be asked to wear  
32 a Fitbit Flex2® physical activity monitor throughout their preoperative treatment. As an  
33 objective measure of background activity, weekly steps will be recorded by a member  
34 of the study's delegation log. Nutritional support will be as per the standard pathway  
35 with regular telephone call and specialist oesophago-gastric dietetic consultations.  
36  
37  
38  
39  
40  
41  
42  
43  
44  
45  
46  
47  
48  
49

50 The control group will not be required to attend any extra appointments as outcome  
51 measure will be performed at the time of a pre-scheduled routine appointment (with  
52 the oncologist or surgeon).  
53  
54  
55  
56  
57  
58  
59  
60



## Study outcomes

The primary outcome (change in AT) will be measured by an incremental symptom-limited CPX test performed by an experienced consultant anaesthetist. All patients will undergo CPX testing at baseline (before the start of neoadjuvant therapy), 2 weeks following completion of NAC, and one week prior to surgery. Other CPX outcomes (Peak  $\text{VO}_2$  and Total Work Rate) will also be analysed.

Feasibility will be assessed by monitoring patient attendance at exercise and medical coaching sessions and adherence to the supervised exercise programme, as well as patient drop-out. Adherence to home exercise sessions will be monitored by a patient-reported diary. Patients will be deemed compliant to the intervention if they complete >75% of scheduled prehabilitation sessions. Weekly steps recorded via a Fitbit Flex2® physical activity monitor.

Insulin resistance will be measured using the HOMA2 calculation. All patients will undergo fasting paired insulin and glucose tests at five stages along the protocol pathway: 1) Before NAC; 2) After cycle 1 of NAC; 3) After cycle 2 of NAC (or if having chemoradiotherapy, midway through chemoradiotherapy); 4) Following completion of cycle 3 (or at the end of chemoradiotherapy); 5) At re-staging laparoscopy; and 6) on the morning of surgical resection. In addition, HbA1c will be measured at baseline and on the day of oesophagectomy/total gastrectomy.

Completion of neoadjuvant therapy will be recorded in conjunction with the patient's consultant oncologist who will be a member of the trial Delegation Log. Toxicity will be

1  
2  
3 monitored between cycles and after completion of chemotherapy and will be graded  
4 according to the Common Terminology Criteria for Adverse Events (CTCAE) v5.0: Mild  
5 (Grade 1), moderate (Grade 2), severe (Grade 3), or life-threatening (Grade 4), with  
6 specific parameters according to the organ system involved.  
7  
8  
9  
10

11  
12  
13 Quality of life (QoL) will be assessed at specific time points: 1) Before commencement  
14 of NAC (baseline); 2) Midway through NAC; 3) Following NAC completion; 4) 2 weeks  
15 post hospital discharge; 5) 6 weeks post discharge; and 6) 6 months following  
16 discharge. Validated questionnaires will include EORTC QLQ-C30, EORTC QLQ –  
17 OG25, Beck Anxiety Inventory (BAI)), and Beck Depression Inventory (BDI II).  
18  
19  
20  
21  
22  
23  
24  
25

26 Nutritional assessment will take the form of hand grip strength (HGS), mid-arm muscle  
27 circumference (MAMC), triceps skin-fold thickness (TSFT), and sarcopenia. HGS,  
28 MAMC and TSFT will be measured at the same time points that preoperative blood  
29 tests are taken, HGS will be measure twice daily on postoperative days 1-3 and once  
30 daily on days 4-7. HGS, MAMC and TSFT will be measured postoperatively at 2  
31 weeks, 6 weeks and 6 months following hospital discharge. As part of standard care,  
32 patients undergo staging CT imaging at baseline and following neoadjuvant therapy.  
33 Sarcopenia will be measured using SliceOmatic™ software at these two time points.  
34  
35 At the L3 level, total skeletal muscle (SM), subcutaneous fat and visceral fat will be  
36 measured. Skeletal muscle index (SMI) will be calculated as follows:  $SM/height(m)^2$ .  
37  
38 Measurements will be recorded by two individuals, one of whom will be external to the  
39  
40  
41  
42  
43  
44  
45  
46  
47  
48  
49  
50  
51  
52  
53  
54  
55  
56  
57  
58  
59  
60  
Trial Group.

1  
2  
3 Surgery will be performed in a standard manner by three experienced oesophago-  
4 gastric consultants. All patients will spend a period of time on intensive care post-  
5 operatively and will follow a dedicated oesophago-gastric Enhanced Recovery After  
6 Surgery (ERAS) pathway. Length of intensive care and hospital stay will be recorded  
7 as will postoperative complications will be measured using the Clavien-Dindo  
8 classification and as per the Esophagectomy Complications Consensus Group [23].  
9 Mortality will be assessed at 30 days, 90 days and 1 year postoperatively. Figures 1  
10 and 2 demonstrate the flow of patients (Figure 1. Consort diagram) and study  
11 schedule (Figure 2. Study diagram).  
12  
13  
14  
15  
16  
17  
18  
19  
20  
21  
22  
23

24 Figure 1. Consort diagram

25  
26 Figure 2. Study diagram  
27  
28  
29  
30

### 31 **Methodology and study design**

32  
33 This trial will be conducted in a single tertiary referral centre for oesophago-gastric  
34 cancer, with all patients treated and followed up at the Royal Surrey County Hospital,  
35 Guildford UK, in conjunction with St Lukes' Cancer Centre. Full disease staging, a  
36 dedicated oesophago-gastric cancer multi-disciplinary team meeting, and assessment  
37 of eligibility will take place prior to patients being approached by the CI or CS. Patients  
38 will be informed of the trial protocol via face to face discussion and a written Patient  
39 Information Leaflet. On inclusion and formal consent to the trial, patients will be  
40 randomised to receive the intervention (Prehab) or standard care Control).  
41  
42 Randomisation will be carried out by a designated member of staff who is not directly  
43 involved in the study. In order to yield 1 : 1 groups, he or she will use computer  
44 generated variable block randomisation, with the group name ('prehab' or 'control')  
45  
46  
47  
48  
49  
50  
51  
52  
53  
54  
55  
56  
57  
58  
59  
60

1  
2  
3 placed in sequentially numbered brown opaque envelopes. The envelopes will be kept  
4  
5 in a locked drawer. On consent of a patient to the trial, the next envelope in sequence  
6  
7 will be handed to the CI who will open the envelope in front of the patient. Due to the  
8  
9 nature of the intervention, the research team and trial participants will not be blinded to  
10  
11 the assigned arm of the trial. Outcome measures are described in detail above.  
12  
13

## 14 15 **Statistical considerations**

### 16 17 Estimation of sample size

18  
19 It has been shown that AT improves following neoadjuvant chemotherapy as a result  
20  
21 of a prehabilitation programme compared with standard care, with an AT difference of  
22  
23 2.12ml/kg/min between Prehab and Control groups [16].  
24  
25  
26  
27

28  
29 To achieve a power of 80% and a significance level of 5% and to allow for confounding  
30  
31 factors in a post-chemotherapy population, we calculate that 48 patients (24 per  
32  
33 group) need to be studied in order to detect an AT difference of 2ml/kg/min between  
34  
35 Prehab and Control group subjects. To allow for a 20% patient drop-out rate (due to  
36  
37 non-compliance or side effects from chemotherapy), 24 patients will be required for  
38  
39 each treatment group resulting in a total accrual of 58.  
40  
41  
42  
43

### 44 45 Statistical analysis

46  
47 Data will be analysed on an intention to treat basis using SPSS software (v24). With  
48  
49 the exception of interim analysis, a  $p$  value of  $<0.05$  will be considered significant.  
50  
51

52  
53 Normality of data will be determined by using the Shapiro-Wilk test. Baseline  
54  
55 characteristics for the two groups will be compared and demonstrated using mean [+/-  
56  
57  
58  
59

1  
2  
3 standard deviation] or the median (with interquartile range) for continuous data. A  
4  
5 mixed-measure analysis of variance (ANOVA) will be employed for the primary  
6  
7 outcome of AT as this will be recorded at three times points (baseline, 2 weeks  
8  
9 following neoadjuvant therapy, and 1 week prior to surgery). An unpaired Student's *t*  
10  
11 test will compare AT and peak VO<sub>2</sub> between the intervention (prehab) and control  
12  
13 groups. A sub-group analysis will be performed, categorising patients into 'low risk'  
14  
15 (AT>11 ml/kg/min, peak VO<sub>2</sub> >800 ml/min/m<sup>2</sup>) and 'high risk' (AT<11 ml/kg/min; peak  
16  
17 VO<sub>2</sub> <800 ml/min/m<sup>2</sup>) [29, 30]. Secondary outcomes including length of hospital stay,  
18  
19 grip strength, quality of life, Fitbit® data etc., will also be analysed using a Student's *t*  
20  
21 test or Mann-Whitney U test. Survival data will be determined using the Kaplan-Meier  
22  
23 curve. Interim analysis will be performed once primary outcome data is available for 26  
24  
25 subjects.  
26  
27  
28  
29  
30  
31  
32

### 33 **Patient and Public Involvement**

34  
35 The CI attended the Oesophageal Patient Association Support Group to engage and  
36  
37 empower patients to help decide upon the programme from previous experiences. All  
38  
39 members were fully engaged, enthusiastic. Patient experience helped shape the study  
40  
41 design, in particular regarding the frequency of researcher and patient interaction, and  
42  
43 number of scheduled exercise sessions.  
44  
45  
46  
47

48  
49 At the time of consent, all patients will be asked whether they would like to receive a  
50  
51 copy of the trial results. If they initial this box, they will be emailed or posted (as per the  
52  
53 patient's preference) a copy of the completed manuscript.  
54  
55  
56  
57  
58  
59  
60

1  
2  
3 Once the patient has completed the programme, the burden of the intervention will be  
4 assessed by patients themselves through the use of a questionnaire.  
5  
6  
7

## 8 9 **Discussion**

10  
11  
12  
13 Neoadjuvant therapy prior to oesophago-gastric resection is the gold standard of care  
14 for patients with T2 and/or nodal disease. Despite this, studies have taught us that  
15 chemotherapy decreases a patients' functional capacity. We aim to show that a  
16 multimodal prehabilitation programme will physically and psychologically optimise  
17 these patients, during and after neoadjuvant therapy, prior to major elective OG cancer  
18 surgery so they may better withstand the immense physical and metabolic stress  
19 placed upon them by radical surgery.  
20  
21  
22  
23  
24  
25  
26  
27  
28  
29  
30

## 31 **Ethics and Dissemination**

### 32 33 34 **Approval**

35  
36 In accordance with the Declaration of Helsinki, the trial was presented to an  
37 independent Research Ethics Committee, the London-Bromley Research Ethics  
38 Committee. Authorisation was obtained from the NHS Health Research Authority on  
39 16<sup>th</sup> November 2016. Any substantial amendment to the protocol or consent form will  
40 be presented to the local Research and Development team and independent  
41 Research Ethics Committee. Likewise, all serious adverse events (AE) will be reported  
42 to the local Research and Development team as well as the independent Research  
43 Ethics Committee. The study is registered on the Clinical Trials website,  
44 ClinicalTrials.gov, under the number NCT02950324. The study is sponsored by The  
45  
46  
47  
48  
49  
50  
51  
52  
53  
54  
55  
56  
57  
58  
59  
60

1  
2  
3 Royal Surrey County Hospital NHS Foundation Trust and funded by Macmillan Cancer  
4 Support. The sponsorship from Macmillan Cancer Support will fund the following:  
5  
6  
7 Exercise sessions at Surrey Sports Park, psychological support in the form of Medical  
8  
9 Coaching, fasting blood tests, and the Fitbit Flex2® physical activity monitors.  
10

### 11 12 13 **Patient informed consent**

14  
15 As per international principles, written informed consent (Appendix 2. Consent form)  
16  
17 will be obtained from patients prior to their participation in the trial once they voluntarily  
18  
19 confirm their understanding and willingness to participate in the trial at least 24 hours  
20  
21 after verbal and written information has been provided and questions answered.  
22  
23 Consent will be obtained by a suitably qualified person in accordance with international  
24  
25 Good Clinical Practice (GCP) guidelines. Patients will be informed that they are free to  
26  
27 withdraw from the trial at any time without giving a reason and they will be informed  
28  
29 that this will not adversely affect any aspects of their care.  
30  
31  
32  
33  
34

### 35 **Data collection and quality management**

36  
37 All data will be collected, handled and stored securely in the Trial Site File only by  
38  
39 experienced persons who have been suitably trained in Good Clinical Practice and  
40  
41 who are a member of the trial Delegation Log. At the time of patient contact, data will  
42  
43 be acquired using a paper case report form (CRF). All study data will be anonymised  
44  
45 by using a using a unique study number assigned to each subject sequentially. CRFs  
46  
47 will be stored in a locked cabinet within a locked drawer of the secure (card-access  
48  
49 only) Research Department. Collated data will be maintained on a pre-defined  
50  
51 confidentially stored and password protected electronic spreadsheet with access  
52  
53 granted only to the CI, CS and Sponsor. Data will be kept for five years following  
54  
55  
56  
57  
58  
59  
60

1  
2  
3 recruitment of the final patient. The trial does not warrant a Data Monitoring Committee  
4 due to its short interventional duration and minimal associated risks, however trial data  
5 will be regularly monitored and audited at regular intervals by the Sponsor and local  
6  
7 R&D department in accordance with the University of Surrey Research Department,  
8  
9 and Good Clinical Practice policies.  
10  
11  
12  
13  
14

### 15 16 **Access to data and dissemination of results**

17  
18 The Chief Investigator and Clinical Supervisor will have full access to the completed  
19  
20 data set, as will the trial's Sponsor. Final data will be summarised on ClinicalTrials.gov,  
21  
22 published in a peer-reviewed journal, and presented at international conferences.  
23  
24  
25

### 26 27 **Trial status**

28  
29 The trial protocol (v1.2 14/10/2016) was presented to an independent Research Ethics  
30  
31 Committee, the London-Bromley Research Ethics Committee. Authorisation was  
32  
33 obtained from the NHS Health Research Authority on 16<sup>th</sup> November 2016.  
34

35  
36 Recruitment started on 15/12/16. To date, 43 patients have been recruited. Six  
37  
38 patients have been lost to follow-up. Interim analysis will be performed once primary  
39  
40 outcome data (change anaerobic threshold) is available for 26 subjects (13 per group).  
41

42  
43 Recruitment will be completed by 1/6/18.  
44  
45

### 46 47 **References**

48  
49  
50 [1] Cunningham D, Allum WH, Stenning SP, et al. Perioperative chemotherapy versus  
51  
52 surgery alone for resectable gastroesophageal cancer. *N Eng J Med* 2006;355[1]:11  
53  
54  
55  
56  
57  
58  
59



1  
2  
3 [2] Allum WH, Stenning SP, Bancewicz J et al. Long-term results of a randomized trial  
4 of surgery with or without preoperative chemotherapy in esophageal cancer. *J Clin*  
5 *Oncol* 2009;27(30):5062-5067  
6  
7

8  
9 [3] Ychou M, Boige V, Pignon J-P et al. Perioperative chemotherapy compared with  
10 surgery alone for resectable gastroesophageal adenocarcinoma: An FNCLCC and  
11 FFCD multicenter III trial. *J Clin Oncol* 2011;29[13]:1715-1721  
12  
13

14  
15 [4] Schumacher C, Gretschel S, Lordick F et al. Neoadjuvant chemotherapy compared  
16 with surgery alone for locally advanced cancer of the stomach and cardia: European  
17 Organisation for Research and Treatment of Cancer randomized trial 40954. *J Clin*  
18 *Oncol* 2010;28[35]:5210-5218  
19  
20  
21  
22  
23

24 [5] Keegan N, Keane F, Cuffe S et al. ICORG 10-14: Neo-AEGIS: A randomized  
25 clinical trial of neoadjuvant and adjuvant chemotherapy [modified MAGIC regimen]  
26 versus neoadjuvant chemoradiation [CROSS protocol] in adenocarcinoma of the  
27 esophagus and esophagogastric junction. *J Clin Oncol* 2014;32[5s]  
28  
29  
30  
31  
32

33 [6] Shapiro J, van Lanschot J, Hulshof M et al. Neoadjuvant chemoradiotherapy plus  
34 surgery versus surgery alone for oesophageal or junctional cancer [CROSS]: long  
35 term results of a randomised controlled trial. *The Lancet* 2015;16:1090-1098  
36  
37  
38

39 [7] Blencowe N, Strong S, McNair A et al. Reporting of short-term clinical outcomes  
40 after esophagectomy: A systematic review. *Ann Surg* 2012;255[4]:658-666  
41  
42

43 [8] West MA, Lythgoe D, Barben CP, et al. Cardiopulmonary exercise variables are  
44 associated with postoperative morbidity after major colonic surgery: a prospective  
45 blinded observational study. *Br J Anaesth* 2014;112[4]:665e71  
46  
47  
48  
49

50 [9] West MA, Parry MG, Lythgoe D, et al. Cardiopulmonary exercise testing for the  
51 prediction of morbidity risk after rectal cancer surgery. *Br J Surg*. 2015;114[2]:244e51  
52  
53  
54  
55  
56  
57  
58  
59  
60

- 1  
2  
3 [10] Moran J, Wilson F, Guinan E, et al. Role of cardiopulmonary exercise testing as a  
4 risk-assessment method in patients undergoing intra-abdominal surgery: a systematic  
5 review. *Br J Anaesth* 2016;116[2]:177e91  
6  
7  
8  
9 [11] West MA, Asher R, Browning M, et al. Validation of preoperative cardiopulmonary  
10 exercise testing-derived variables to predict in-hospital morbidity after major colorectal  
11 surgery. *Br J Surg* 2016; 103(6): 744-752  
12  
13  
14  
15 [12] Jack S, West MA, Raw D, et al. The effect of neoadjuvant chemotherapy on  
16 physical fitness and survival in patients undergoing oesophagogastric cancer surgery.  
17 *EJSO* 2014; 40: 1313-1320  
18  
19  
20  
21 [13] O'Doherty A, West M, Jack S et al. Preoperative aerobic exercise training in  
22 elective intra-cavity surgery: a systematic review. *Br J Anaesth* 2013 110[5]: 679-689  
23  
24  
25 [14] Dunne D, Jack S, Joens R et al. Randomized clinical trial of prehabilitation before  
26 planned liver resection. *Br J Surg* 2016; 103: 504-512  
27  
28  
29  
30 [15] Holloszy JO, Coyle EF. Adaptations of skeletal muscle to endurance exercise and  
31 their metabolic consequences. *J Appl Physiol* 1984; 5(4): 831-838  
32  
33  
34 [16] West MA, Loughney L, Lythgoe et al. Effect of prehabilitation on objectively  
35 measured physical fitness after neoadjuvant treatment in preoperative rectal cancer  
36 patients: a blinded interventional pilot study. *Br J Anaesth* 2015; 2: 244-251  
37  
38  
39 [17] Heldens A, Bongers BC, de Vos-Geelen J et al. Feasibility and preliminary  
40 effectiveness of a physical exercise training program during neoadjuvant  
41 chemoradiotherapy in individual patients with rectal cancer prior to major elective  
42 surgery. *EJSO* 2016; 42: 1322-1330  
43  
44  
45  
46 [18] DiMatteo MR, Lepper HS, Croghan TW. Depression is a risk factor for  
47 noncompliance with medical treatment: meta-analysis of the effects of anxiety and  
48 depression on patient adherence. *Arch Intern Med*. 2000;160:2101–2107.  
49  
50  
51  
52  
53  
54  
55  
56  
57  
58  
59  
60

- 1  
2  
3 [19] Garssen B, Boomsma MF, Meezenbroek Ede J, et al. Stress management  
4 training for breast cancer surgery patients. *Psychooncology*. 2013;22:572–580.  
5  
6 [20] Parker PA, Pettaway CA, Babaian RJ, et al. The effects of a presurgical stress  
7 management intervention for men with prostate cancer undergoing radical  
8 prostatectomy. *J Clin Oncol*. 2009;27: 3169–3176.  
9  
10 [21] Mayo NE, Feldman L, Scott S, et al. Impact of preoperative change in physical  
11 function on postoperative recovery: argument supporting prehabilitation for colorectal  
12 surgery. *Surgery*. 2011;150:505–514.  
13  
14 [22] Tsimopoulou J, Pasquali S, Howard R et al. Psychological prehabilitation before  
15 cancer surgery: A systematic review. *Ann Surg Oncol* 2015; 22: 4117-4123  
16  
17 [23] Sato H, Carvalho G, Sato T et al. The association of preoperative glycaemic  
18 control, intraoperative insulin sensitivity, and outcomes after cardiac surgery. *J Clin*  
19 *Endocrinol Metab* 2010; 95(9): 4338-4344  
20  
21 [24] Ljungqvist O, Nygren J, Soop M, et al. Metabolic perioperative management:  
22 novel concepts. *Curr Opin Crit Care* 2005; 11: 295-299  
23  
24 [25] Yip C, Davies A, Gossage A et al. Assessment of sarcopenia and changes in  
25 body composition after neoadjuvant chemotherapy and associations with clinical  
26 outcomes in oesophageal cancer. *Eur Radiol* 2014; 24: 998-1005  
27  
28 [26] Paireder M, Asari R, Kristo I et al. Impact of sarcopenia on outcome in patients  
29 with esophageal resection following neoadjuvant chemotherapy for esophageal  
30 cancer. *EJSO* 2017; 43: 478-484  
31  
32 [27] Low D, Alderson D, Cecconello I et al. International consensus on standardization  
33 of data collection for complications associated with esophagectomy: Esophagectomy  
34 Complications Consensus Group [ECCG]. *Ann Surg* 2015; 262(2): 286-294  
35  
36  
37  
38  
39  
40  
41  
42  
43  
44  
45  
46  
47  
48  
49  
50  
51  
52  
53  
54  
55  
56  
57  
58  
59  
60

1  
2  
3 [28] Nelson. E. M., Rejeski. J. W., Blair. S. N. et al. Physical Activity and Public Health  
4 in Older Adults. Circulation 2007; 116: 1094-1105.

5  
6  
7 [29] Older P, Hall A, Hader R. Cardiopulmonary exercise testing as a screening test for  
8 perioperative management of major surgery in the elderly. Chest 1999; 116(2): 355-  
9  
10  
11 362

12  
13 [30] Nagamatsu Y, Shima I, Yamana H et al. Preoperative evaluation of  
14 cardiopulmonary reserve with the use of expired gas analysis during exercise testing  
15 in patients with squamous cell carcinoma of the thoracic esophagus. J Thorac and  
16  
17  
18  
19  
20  
21  
22  
23  
24  
25  
26  
27  
28  
29  
30  
31  
32  
33  
34  
35  
36  
37  
38  
39  
40  
41  
42  
43  
44  
45  
46  
47  
48  
49  
50  
51  
52  
53  
54  
55  
56  
57  
58  
59  
60  
Cardiovasc Surgery 121(6): 1064-1068

### **Authors statement**

Sophie Allen, Vanessa Brown, Michael Scott, Pradeep Prabhu, Timothy Rockall,  
Shaun Preston and Javed Sultan have all: Made substantial contributions to  
conception and design, or acquisition of data, or analysis and interpretation of data;  
Have been involved in drafting the manuscript or revising it critically for important  
intellectual content; Have given final approval of the version to be published and has  
participated sufficiently in the work to take public responsibility for appropriate portions  
of the content and have agreed to be accountable for all aspects of the work in  
ensuring that questions related to the accuracy or integrity of any part of the work are  
appropriately investigated and resolved.

The trial management committee (SA and JS) will be responsible for the following:  
Organisation of steering committee meetings; the trial site file; randomisation  
(performed by a person external to the trial); budget administration and liaising with the

1  
2  
3 funding source and Sponsor; reporting of adverse events; completion of CRFs;  
4  
5 identification and recruitment of patients; adherence to the study protocol; and  
6  
7 publication of study results. The steering committee (SA/VB/PP/SP/TR/JS) were in  
8  
9 agreement of the final protocol and will review the progress of the study, liaising with  
10  
11 the CI to ensure the study runs smoothly.  
12  
13

### 14 15 **Funding**

16  
17  
18  
19  
20 This work is supported by Macmillan Cancer Support, Grant number 5227431  
21  
22 (received 25/6/15) and Grant number 5635161 (received 25/10/16).  
23  
24  
25

26  
27 The funding body are responsible for funding participant participation at Surrey Sports  
28  
29 Park, all Medical Coaching sessions, the use of Fitbit® physical activity monitors, the  
30  
31 cost of fasting glucose and insulin blood tests, and the CPX test. This funding source  
32  
33 had no role in the design of this study and will not be involved in analysis of the  
34  
35 results, interpretation of data, or decision to submit results.  
36  
37  
38  
39

### 40 **BMJ Group declaration of interests statement**

41  
42  
43  
44 I have read and understood the BMJ Group Policy on declaration of interests and  
45  
46 declare the following interests: None  
47

48 Name: Sophie K Allen Date: 2/3/18  
49  
50  
51

### 52 **Acknowledgments**

53  
54  
55  
56  
57  
58  
59  
60

1  
2  
3 The authors thank the following for their contributions to this study protocol: Mohamad  
4 Atie<sup>1</sup>, Lucy-Ann Bett<sup>4</sup>, Sebastian Cummins<sup>1</sup>, Shirley Edghill<sup>4</sup>, Lizzie Elam<sup>1</sup>, Annabelle  
5 Emery<sup>3</sup>, Alice Extance<sup>1</sup>, Madeleine Hewish<sup>1</sup>, Emily Hodge<sup>5</sup>, Fiona Huddy<sup>1</sup>, Julie Hunt<sup>6</sup>,  
6  
7 Marianne Illsley<sup>1</sup>, Alice Kidd<sup>1</sup>, David King<sup>3</sup>, Aga Kehinde<sup>5</sup>, Anna McGuire<sup>1</sup>, Ajay  
8  
9 Mehta<sup>1</sup>, Sarah Oakes<sup>1</sup>, Anne Pike<sup>5</sup>, Natalie Silverdale<sup>5</sup>, Sukhpal Singh<sup>2</sup>, David  
10  
11 Timbrell<sup>1</sup>, Mary Townsend<sup>2</sup>, Lizzie Underhill<sup>2</sup>, Joe Wainwright<sup>3</sup> Naomi Westran<sup>1</sup>, Martin  
12  
13 Whyte<sup>6</sup>, Minimal Access Therapy Training Unit (MATTU) Guildford, The Oesophageal  
14  
15 Patient Association Support Group  
16  
17

18  
19  
20 <sup>1</sup> The Royal Surrey County Hospital NHS Foundation Trust  
21

22 <sup>2</sup> Frimley Park Hospital  
23

24 <sup>3</sup> Human Performance Institute, Surrey Sports Park  
25

26 <sup>4</sup> Macmillan Cancer Support  
27

28 <sup>5</sup> The Fountain Centre, St Lukes Cancer Centre  
29

30 <sup>6</sup> The University of Surrey  
31  
32  
33  
34

### 35 **Sponsor**

36 Sarah Martin  
37

38 Research, Development and Innovations Manager  
39

40 Leggett Building  
41

42 Manor Park  
43

44 Guildford  
45

46 GU2 7WG  
47  
48  
49  
50  
51

### 52 **List of figures**

53  
54  
55  
56  
57  
58  
59  
60

1  
2  
3 Figure 1. Consort diagram

4  
5 Figure 2. Study diagram

6  
7  
8 **Appendix**

9  
10  
11  
12  
13 Appendix 1. Patient information leaflet

14  
15 Appendix 2. Consent form

16  
17  
18  
19 **List of abbreviations**

20  
21  
22  
23  
24 AE – Adverse event

25  
26 AT – Anaerobic threshold

27  
28 CI – Chief investigator

29  
30 CNS – Clinical nurse specialist

31  
32 CS – Clinical Supervisor

33  
34 CPX test – Cardiopulmonary Exercise Test

35  
36 CRF – Case report form

37  
38 GCP – Good Clinical Practice

39  
40 HEP – Home exercise plan

41  
42 HOMA2 – Homeostasis model assessment

43  
44 HRR – Heart rate reserve

45  
46 ICF - International Coaching Federation

47  
48 IR – Insulin Resistance

49  
50 MDT - Multi-disciplinary Team

51  
52 NAC – Neo-adjuvant chemotherapy

53  
54 NCP - National Council of Psychotherapists

1  
2  
3 OGCS – Oesophago-gastric cancer surgery

4  
5 POMS – Post-operative morbidity score

6  
7 Prehab – Prehabilitation

8  
9 RSCH – Royal Surrey County Hospital

10  
11 VO<sub>2</sub> peak – Peak oxygen uptake  
12  
13  
14  
15  
16  
17  
18  
19  
20  
21  
22  
23  
24  
25  
26  
27  
28  
29  
30  
31  
32  
33  
34  
35  
36  
37  
38  
39  
40  
41  
42  
43  
44  
45  
46  
47  
48  
49  
50  
51  
52  
53  
54  
55  
56  
57  
58  
59  
60

For peer review only



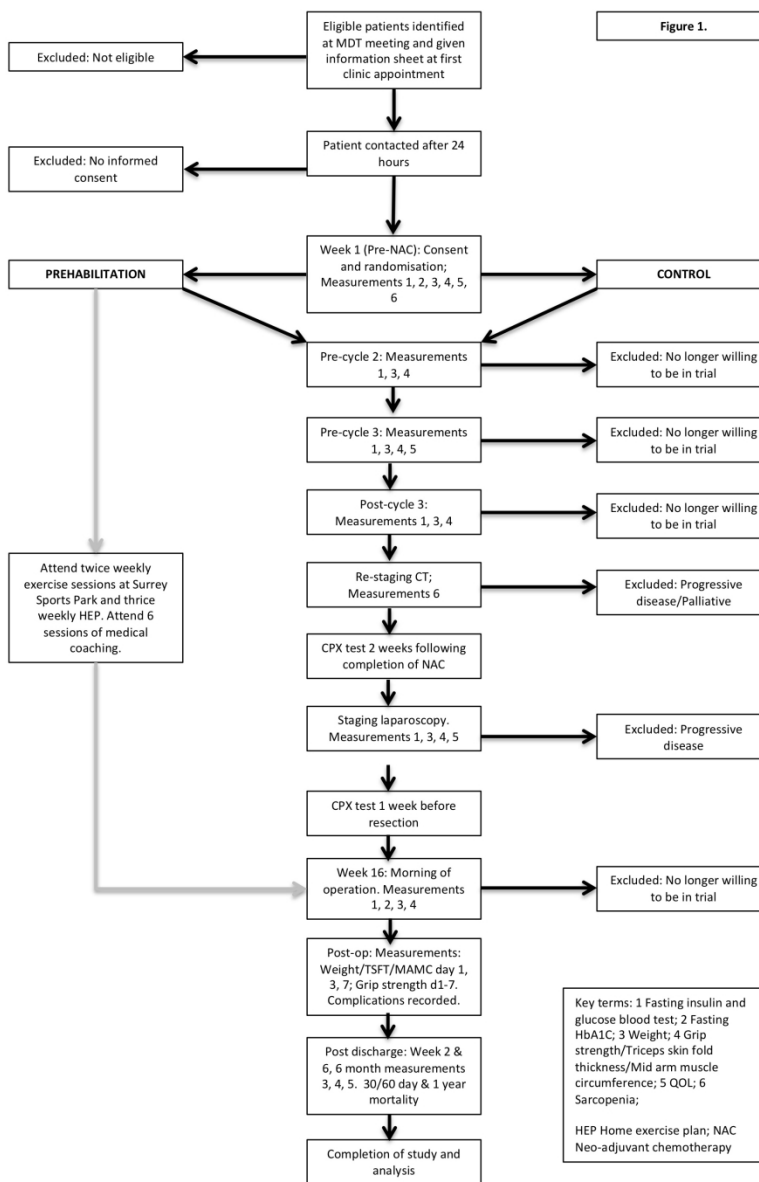

190x254mm (300 x 300 DPI)

| Timepoint                   | Enrolment and Allocation |        |        |         |         |         |         | Surgery | Follow up |                  |                        |                        |                         |                       |
|-----------------------------|--------------------------|--------|--------|---------|---------|---------|---------|---------|-----------|------------------|------------------------|------------------------|-------------------------|-----------------------|
|                             | Week 1                   | Week 4 | Week 7 | Week 10 | Week 12 | Week 13 | Week 15 |         | Week 16   | Days 1-7 post-op | 2 weeks post discharge | 6 weeks post discharge | 6 months post discharge | 1 year post discharge |
| Enrolment:                  |                          |        |        |         |         |         |         |         |           |                  |                        |                        |                         |                       |
| Eligibility screen          | X                        |        |        |         |         |         |         |         |           |                  |                        |                        |                         |                       |
| Informed consent            | X                        |        |        |         |         |         |         |         |           |                  |                        |                        |                         |                       |
| Allocation                  | X                        |        |        |         |         |         |         |         |           |                  |                        |                        |                         |                       |
| Interventions:              |                          |        |        |         |         |         |         |         |           |                  |                        |                        |                         |                       |
| Prehab                      | X                        | X      | X      | X       | X       | X       | X       |         |           |                  |                        |                        |                         |                       |
| Control                     | X                        | X      | X      | X       | X       | X       | X       |         |           |                  |                        |                        |                         |                       |
| Assessments:                |                          |        |        |         |         |         |         |         |           |                  |                        |                        |                         |                       |
| CPX (AT and peak VO2)       | X                        |        |        |         | X       |         | X       |         |           |                  |                        |                        |                         |                       |
| Sarcopenia assessment       | X                        |        |        | X       |         |         |         |         |           |                  |                        |                        |                         |                       |
| Weight                      | X                        | X      | X      |         |         |         | X       | X       | X         | X                | X                      | X                      |                         |                       |
| Fasting HbA1c               | X                        |        |        |         |         |         | X       |         |           |                  |                        |                        |                         |                       |
| Fasting insulin and glucose | X                        | X      | X      | X       |         |         | X       |         |           |                  |                        |                        |                         |                       |
| Grip strength               | X                        | X      | X      | X       |         |         | X       | X       | X         | X                | X                      | X                      |                         |                       |
| TST                         | X                        | X      | X      | X       |         |         | X       | X       | X         | X                | X                      | X                      |                         |                       |
| HAAC                        | X                        | X      | X      | X       |         |         | X       | X       | X         | X                | X                      | X                      |                         |                       |
| QOL                         | X                        |        | X      |         |         |         | X       |         | X         | X                | X                      | X                      |                         |                       |
| Complications               |                          |        |        |         |         |         |         |         | X         | X                |                        |                        |                         |                       |
| Mortality                   |                          |        |        |         |         |         |         |         |           | X                | X                      |                        | X                       |                       |
| Analysis                    |                          |        |        |         |         |         |         |         |           |                  |                        |                        |                         | X                     |

Figure 2. Study diagram

296x209mm (300 x 300 DPI)

(Chemotherapy)

Royal Surrey County Hospital   
NHS Foundation Trust

## Patient information leaflet

### Does prehabilitation improve cardiopulmonary exercise performance in patients undergoing neoadjuvant treatment and surgery for oesophagogastric cancer

Mr Javed Sultan, Consultant Surgeon  
Professor Timothy Rockall, Professor of Surgery  
Dr Julie Hunt, Lecturer in Sport and Exercise Sciences  
Professor Mike Scott, Consultant Anaesthetist  
Miss Sophie Allen, Research Fellow, Principal Investigator

“Does exercise improve exercise test results and recovery after surgery  
in people with oesophagogastric cancer?”

#### Invitation to participate

You are being invited to take part in a research study. Before you decide, it is important for you to understand why the research is being done and what it will involve. This information sheet is designed to help you decide whether you would like to participate in this study. Please take time to read the following information carefully and discuss it with others if you wish. Ask us if there is anything that is not clear or if you would like more information. Take time to decide whether or not you wish to take part.

Thank you for reading this.

#### What is the purpose of the study?

Recent studies have shown that regular supervised exercise (prehabilitation) can improve patients' fitness prior to surgery, improve the way their body handles sugar and improve their recovery after surgery. Cardiopulmonary exercise (CPX) testing measures the function of your heart and lungs in response to exercise (see separate information leaflet 'Your Cardio Pulmonary Exercise test'). Studies have shown that the better your CPX result, the less likely you are to have complications after a big operation.

The aim of this study is to see if regular supervised exercise (prehabilitation) improves performance in CPX and recovery after surgery. The study will last up to approximately 22 weeks in total.

1.  
Does prehabilitation improve cardiopulmonary exercise performance in patients undergoing  
neoadjuvant treatment and surgery for oesophagogastric cancer  
(REC 16/LO/1702, R+D 16SURN213028, NCT, IRAS ID 213028)  
Version 3.1 13/10/2017

209x296mm (300 x 300 DPI)

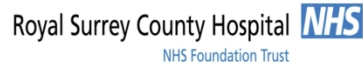

Study Number: REC 16/LO/1702 R+D 16SURN213028 IRAS ID: 213028 Patient copy
Patient Identification Number for this trial: [ ]

CONSENT FORM

Title of Project: Does prehabilitation improve cardiopulmonary exercise performance in patients undergoing neoadjuvant treatment and surgery for oesophagogastric cancer?

Please initial boxes

- 1. I confirm that I have read and understand the information sheet (Version 3.1 Date 13/10/2017) for the above study and have had the opportunity to consider the information, ask questions and have had these answered satisfactorily.
2. I understand that my participation is voluntary and that I am free to withdraw at any time, without giving any reason, without my medical care or legal rights being affected.
3. I understand that the relevant sections of any of my medical notes and data collected may be looked at by responsible individuals or from regulatory authorities where it is relevant to my taking part in research. I give permission for these individuals to have access to my relevant records.
4. I am aware of the need for psychological support whilst taking part in this study and it has been explained to me how I can obtain this support.
5. I agree to take part in the above study and to my General Practitioner being informed of my participation in the study
6. I agree that my biological materials (blood and tumour samples) collected, and CT scans performed during the study as part of the standard of care, but not related to study procedures etc, may be saved and used for later analysis
7. Once the study has been completed and analysed I would like to be sent you a summary of the results.

Name of Patient Signature Date
Name of Person taking consent (if different from researcher) Signature Date
Researcher Signature Date

209x296mm (300 x 300 DPI)

|                                 |                      |                                                                                                                                                                                                                                                                                                                                                                                |                  |
|---------------------------------|----------------------|--------------------------------------------------------------------------------------------------------------------------------------------------------------------------------------------------------------------------------------------------------------------------------------------------------------------------------------------------------------------------------|------------------|
|                                 |                      | individuals who will perform the interventions (eg, surgeons, psychotherapists)                                                                                                                                                                                                                                                                                                |                  |
| Interventions: description      | <a href="#">#11a</a> | Interventions for each group with sufficient detail to allow replication, including how and when they will be administered                                                                                                                                                                                                                                                     | 10, 11, 12, 13   |
| Interventions: modifications    | <a href="#">#11b</a> | Criteria for discontinuing or modifying allocated interventions for a given trial participant (eg, drug dose change in response to harms, participant request, or improving / worsening disease)                                                                                                                                                                               | 8                |
| Interventions: adherence        | <a href="#">#11c</a> | Strategies to improve adherence to intervention protocols, and any procedures for monitoring adherence (eg, drug tablet return; laboratory tests)                                                                                                                                                                                                                              | 11, 12, 13       |
| Interventions: concomitant care | <a href="#">#11d</a> | Relevant concomitant care and interventions that are permitted or prohibited during the trial                                                                                                                                                                                                                                                                                  | n/a              |
| Outcomes                        | <a href="#">#12</a>  | Primary, secondary, and other outcomes, including the specific measurement variable (eg, systolic blood pressure), analysis metric (eg, change from baseline, final value, time to event), method of aggregation (eg, median, proportion), and time point for each outcome. Explanation of the clinical relevance of chosen efficacy and harm outcomes is strongly recommended | 11, 12, 13       |
| Participant timeline            | <a href="#">#13</a>  | Time schedule of enrolment, interventions (including any run-ins and washouts), assessments, and visits for participants. A schematic diagram is highly recommended (see Figure)                                                                                                                                                                                               | 13<br>(Figure 2) |
| Sample size                     | <a href="#">#14</a>  | Estimated number of participants needed to achieve study objectives and how it was determined, including clinical and statistical assumptions supporting any sample size calculations                                                                                                                                                                                          | 14, 15           |
| Recruitment                     | <a href="#">#15</a>  | Strategies for achieving adequate participant enrolment to reach target sample size                                                                                                                                                                                                                                                                                            | 14, 15, 16       |
| Allocation: sequence generation | <a href="#">#16a</a> | Method of generating the allocation sequence (eg, computer-generated random numbers), and list of any                                                                                                                                                                                                                                                                          |                  |

215x279mm (300 x 300 DPI)
